# Supplementary material for: Pd-N-heterocyclic carbene complex catalysed C–H bond activation of 2-isobutylthiazole at the C5 position with aryl bromides
Source: Royal Society of Chemistry journal article supplement (doi:10.1039/d1nj00514f), 2021-01-01
Supplement: d1nj00514f1.pdf [file d1nj00514f1.pdf]

## Supporting Information

### **Pd-*N*-heterocyclic carbene complex catalyzed C-H Bond activation of 2-isobutylthiazole at C5 position with aryl bromides**

Siraj Khan,<sup>a</sup> Nesrin Buğday,<sup>b</sup> Sedat Yaşar,<sup>\*b</sup> Naseem Ullah,<sup>a</sup> İsmail Özdemir<sup>b</sup>

<sup>a</sup>Quaid-i-Azam University, Faculty of Biological Sciences, Department of Pharmacy, Islamabad, 45320, Pakistan

<sup>b</sup>İnönü University, Faculty of Science and art, Department of Chemistry, 44210, Malatya, Turkey

Corresponding author: Sedat Yaşar, e-mail: [sedat.yasar@inonu.edu.tr](mailto:sedat.yasar@inonu.edu.tr), phone:+904223413737, fax:+904223410212

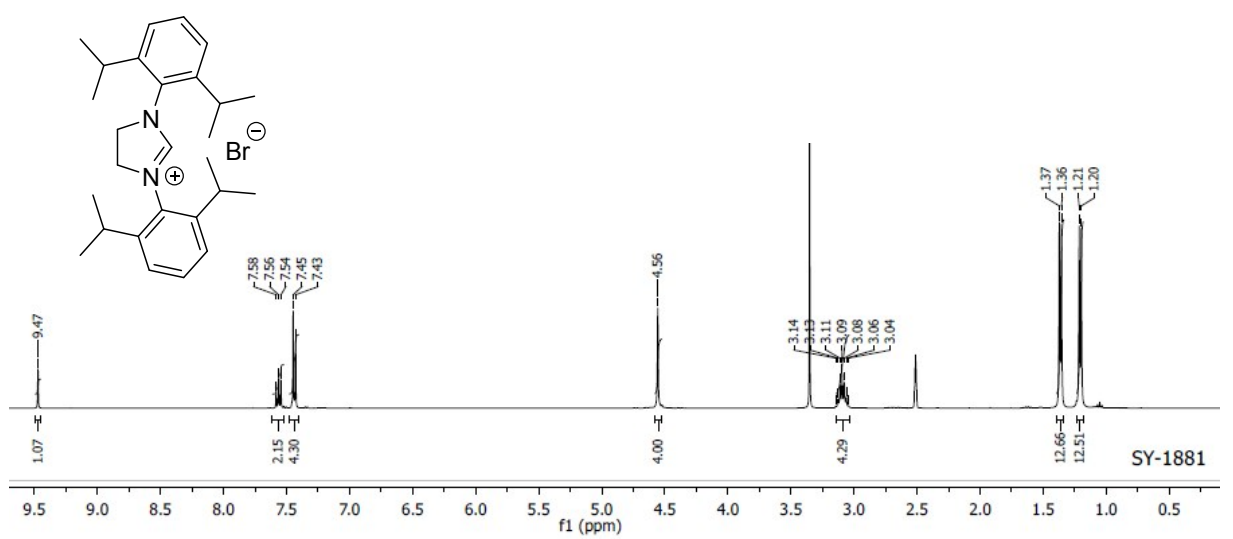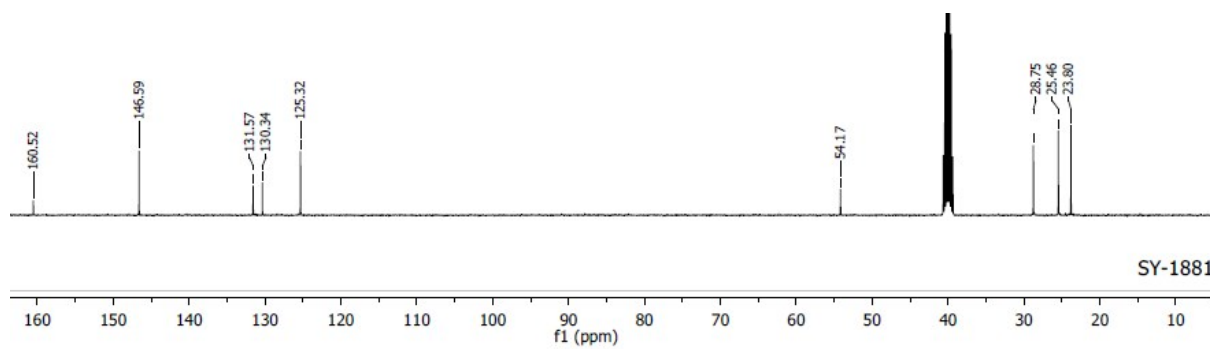

**Figure S1.** <sup>1</sup>H NMR and <sup>13</sup>C NMR spectra of **1**

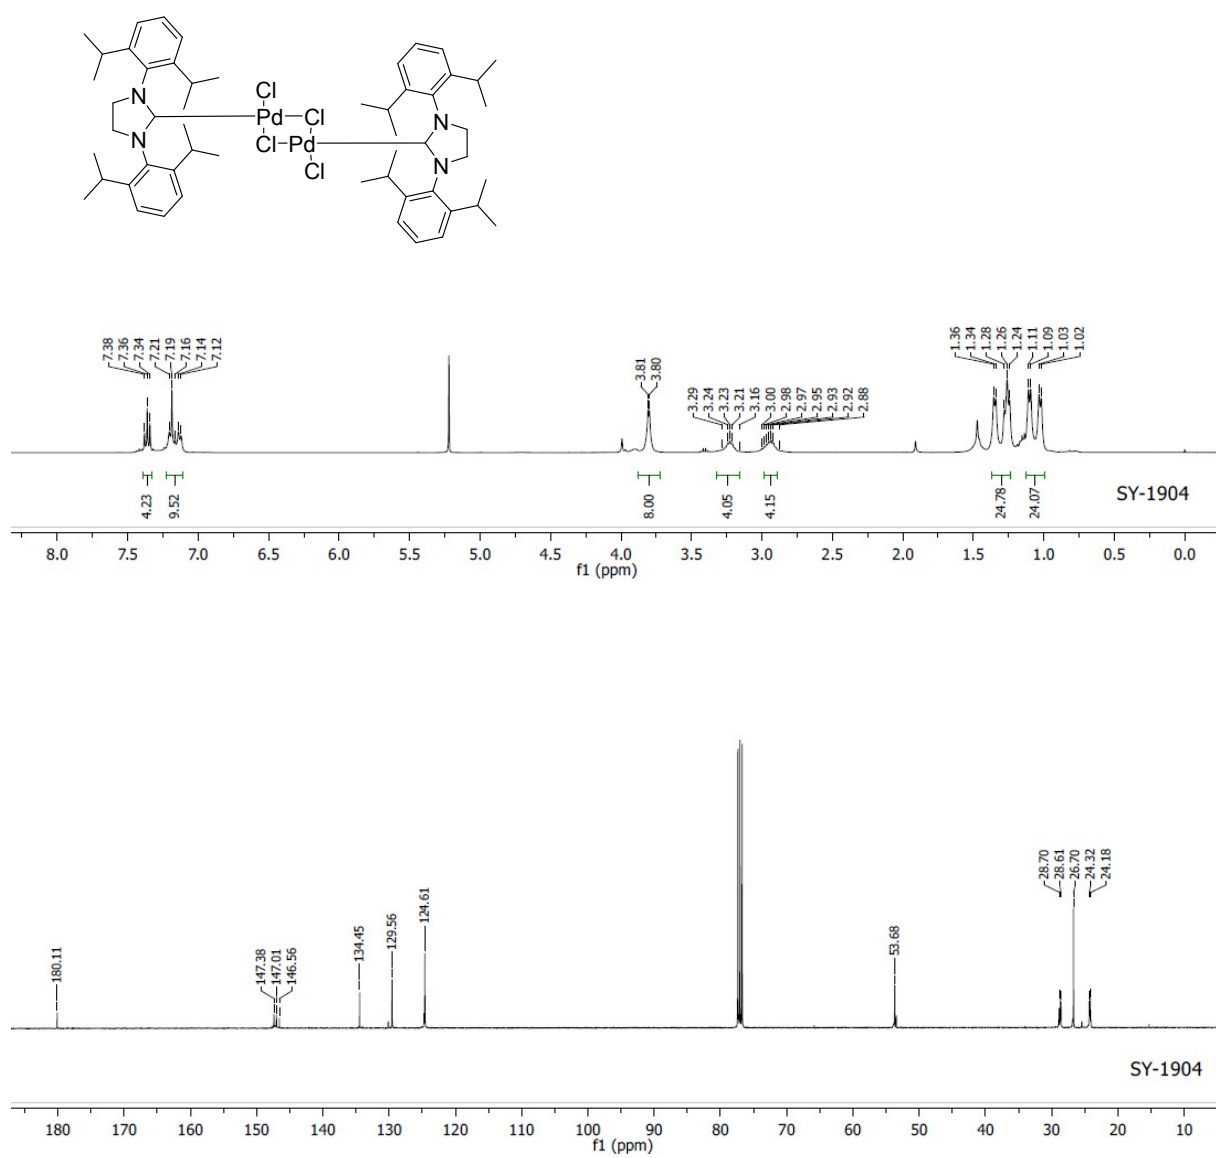

**Figure S2.** <sup>1</sup>H NMR and <sup>13</sup>C NMR spectra of **2**

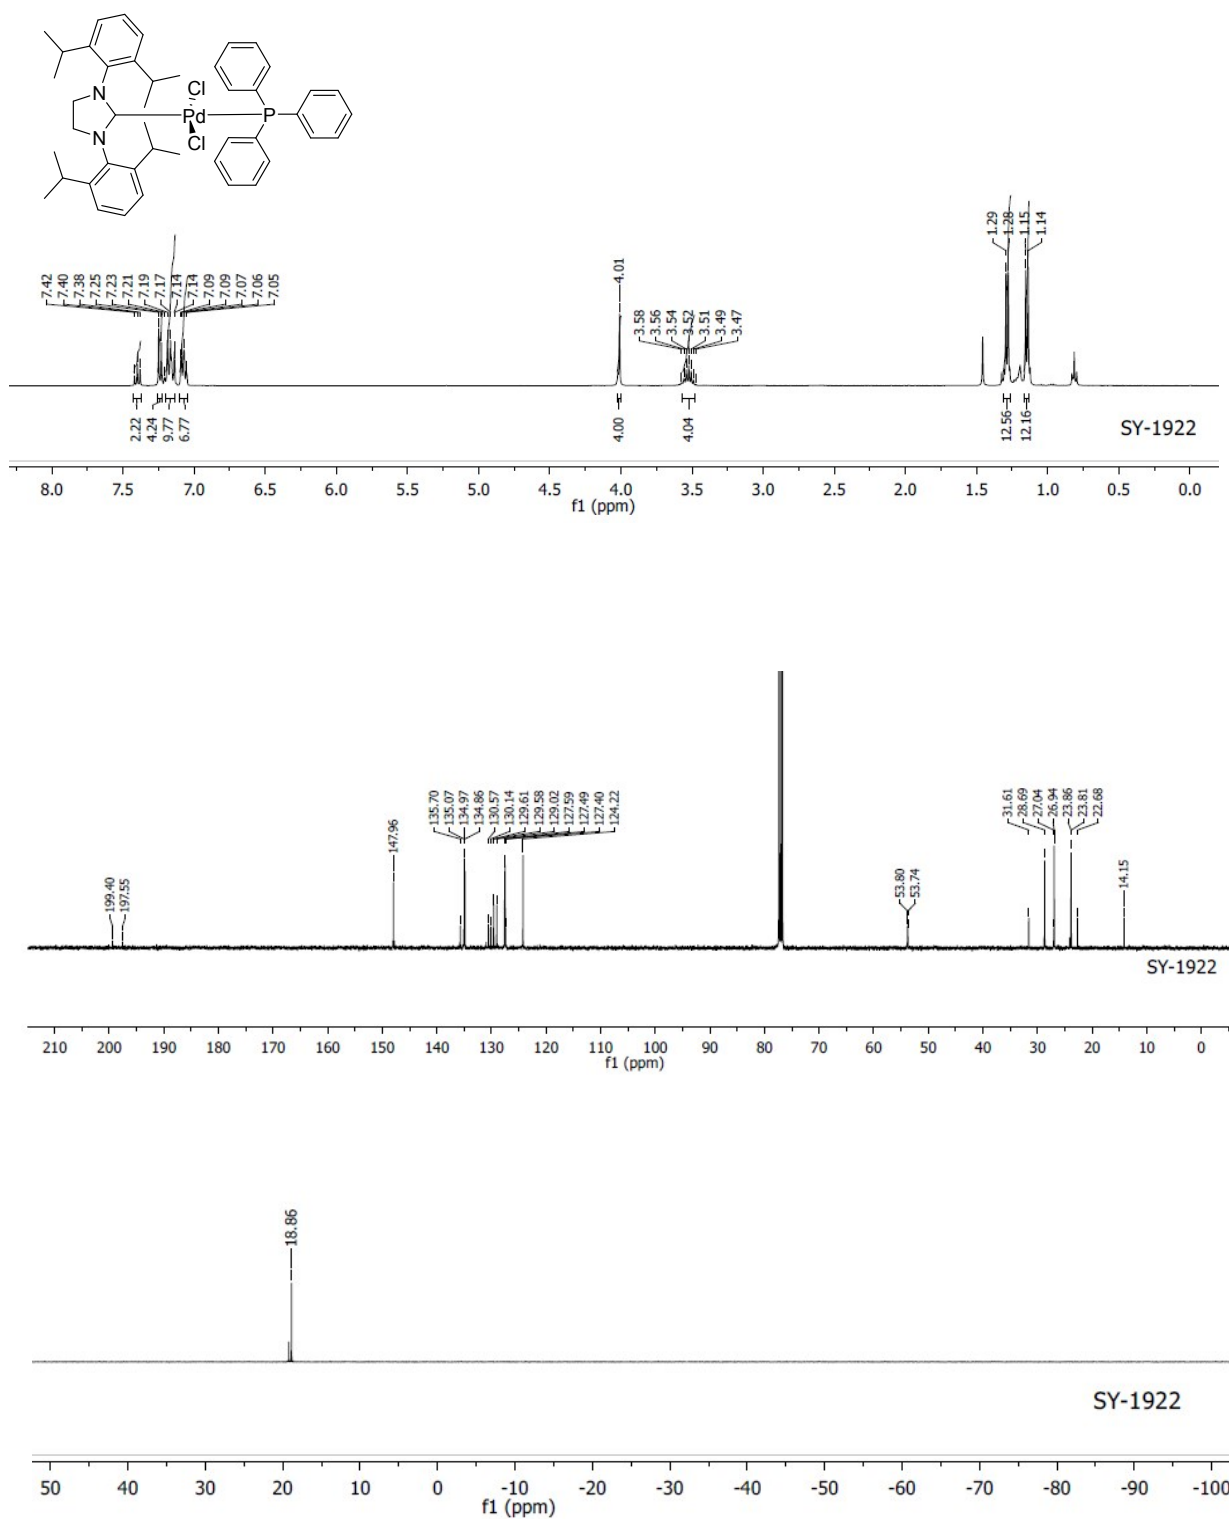

**Figure S3.** <sup>1</sup>H NMR, <sup>13</sup>C NMR and <sup>31</sup>P NMR spectra of **3**

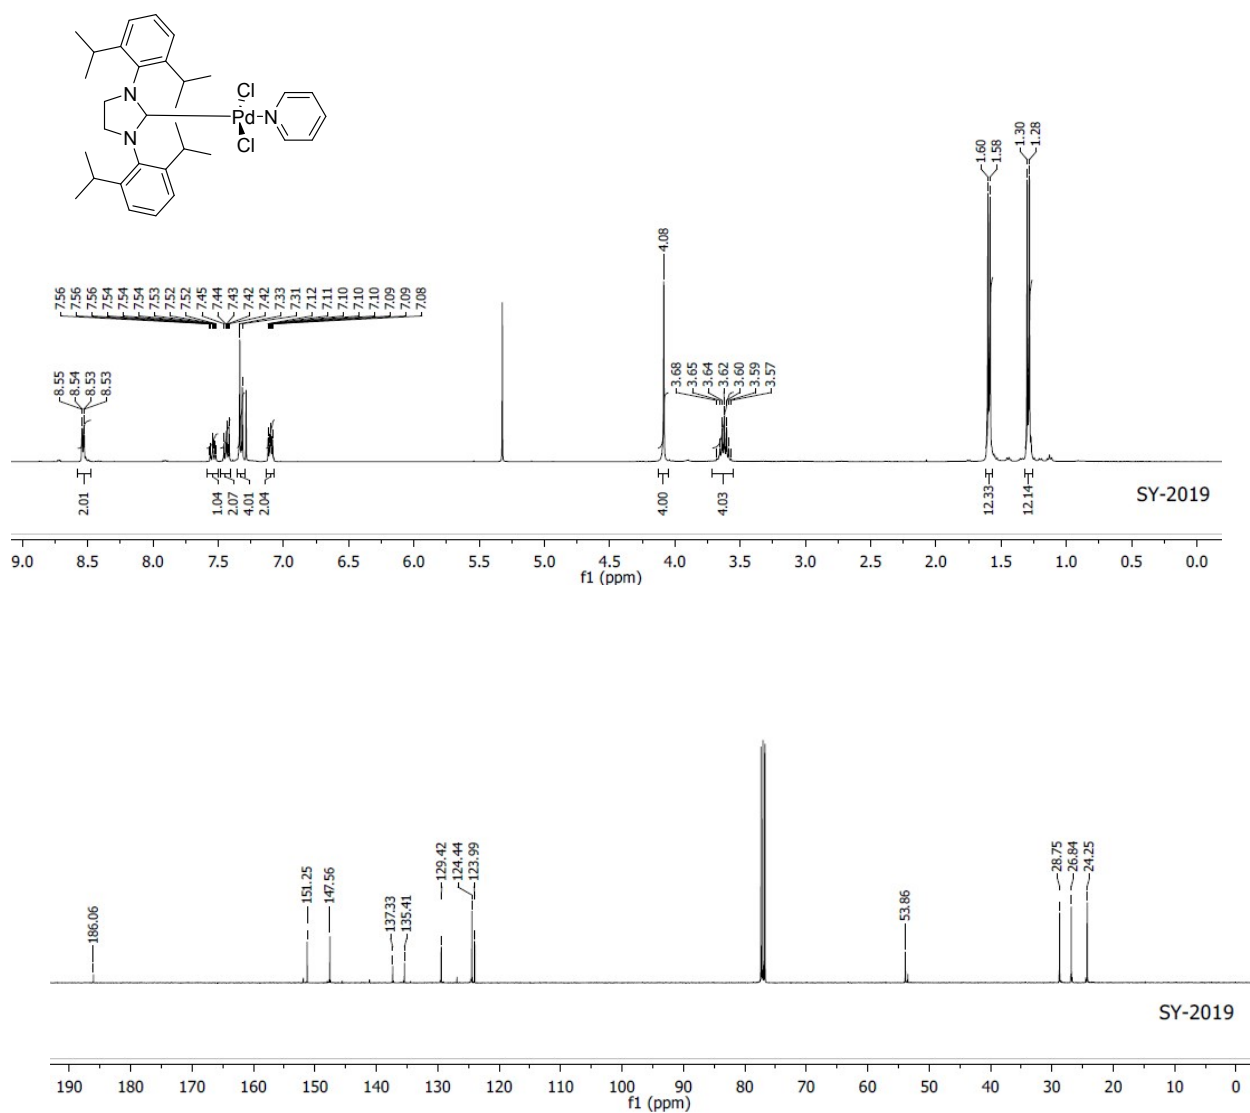

**Figure S4.** <sup>1</sup>H NMR and <sup>13</sup>C NMR spectra of 4

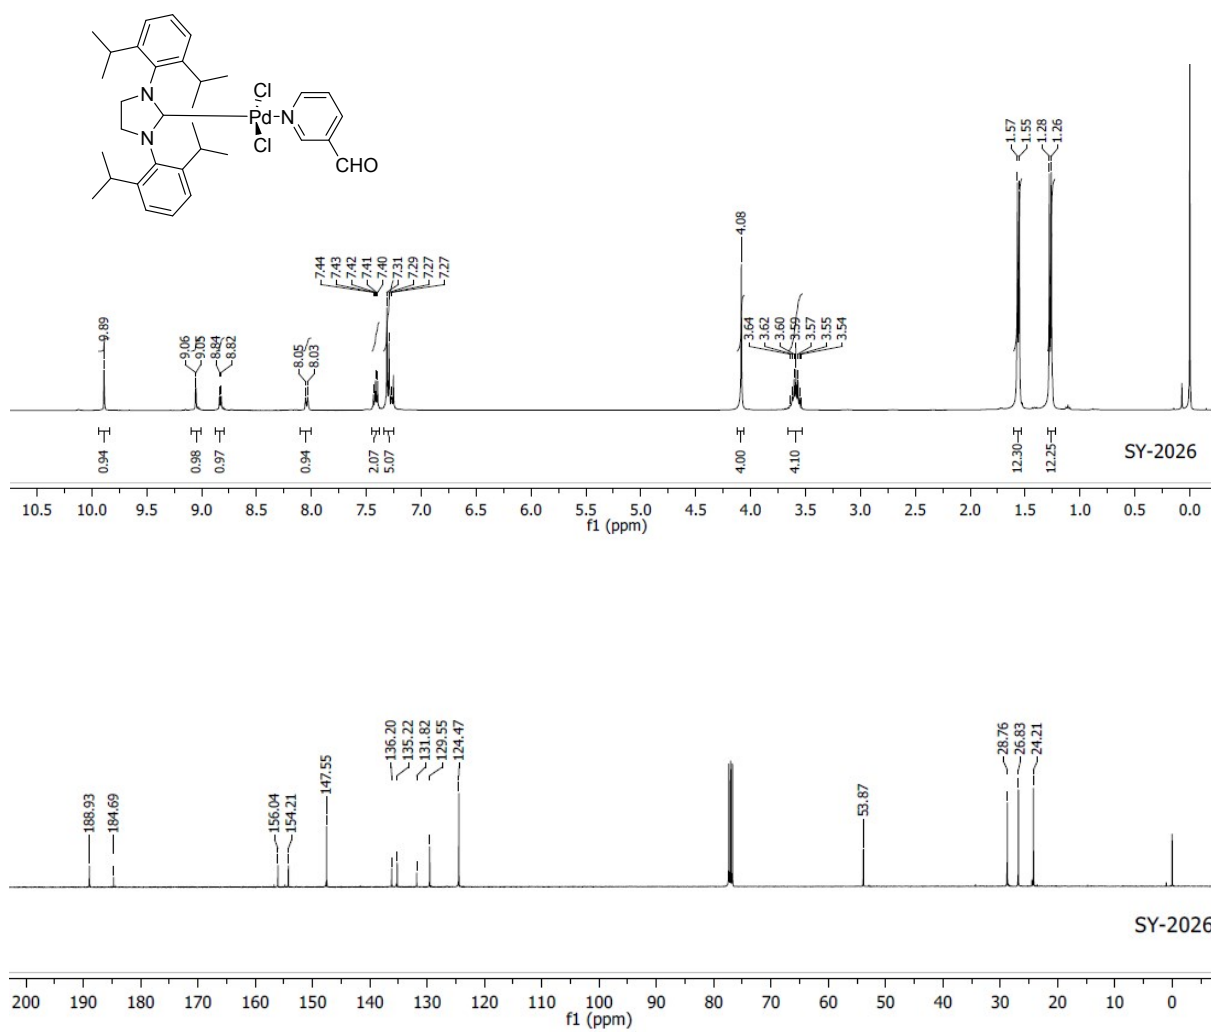

Figure S5. <sup>1</sup>H NMR and <sup>13</sup>C NMR spectra of 5

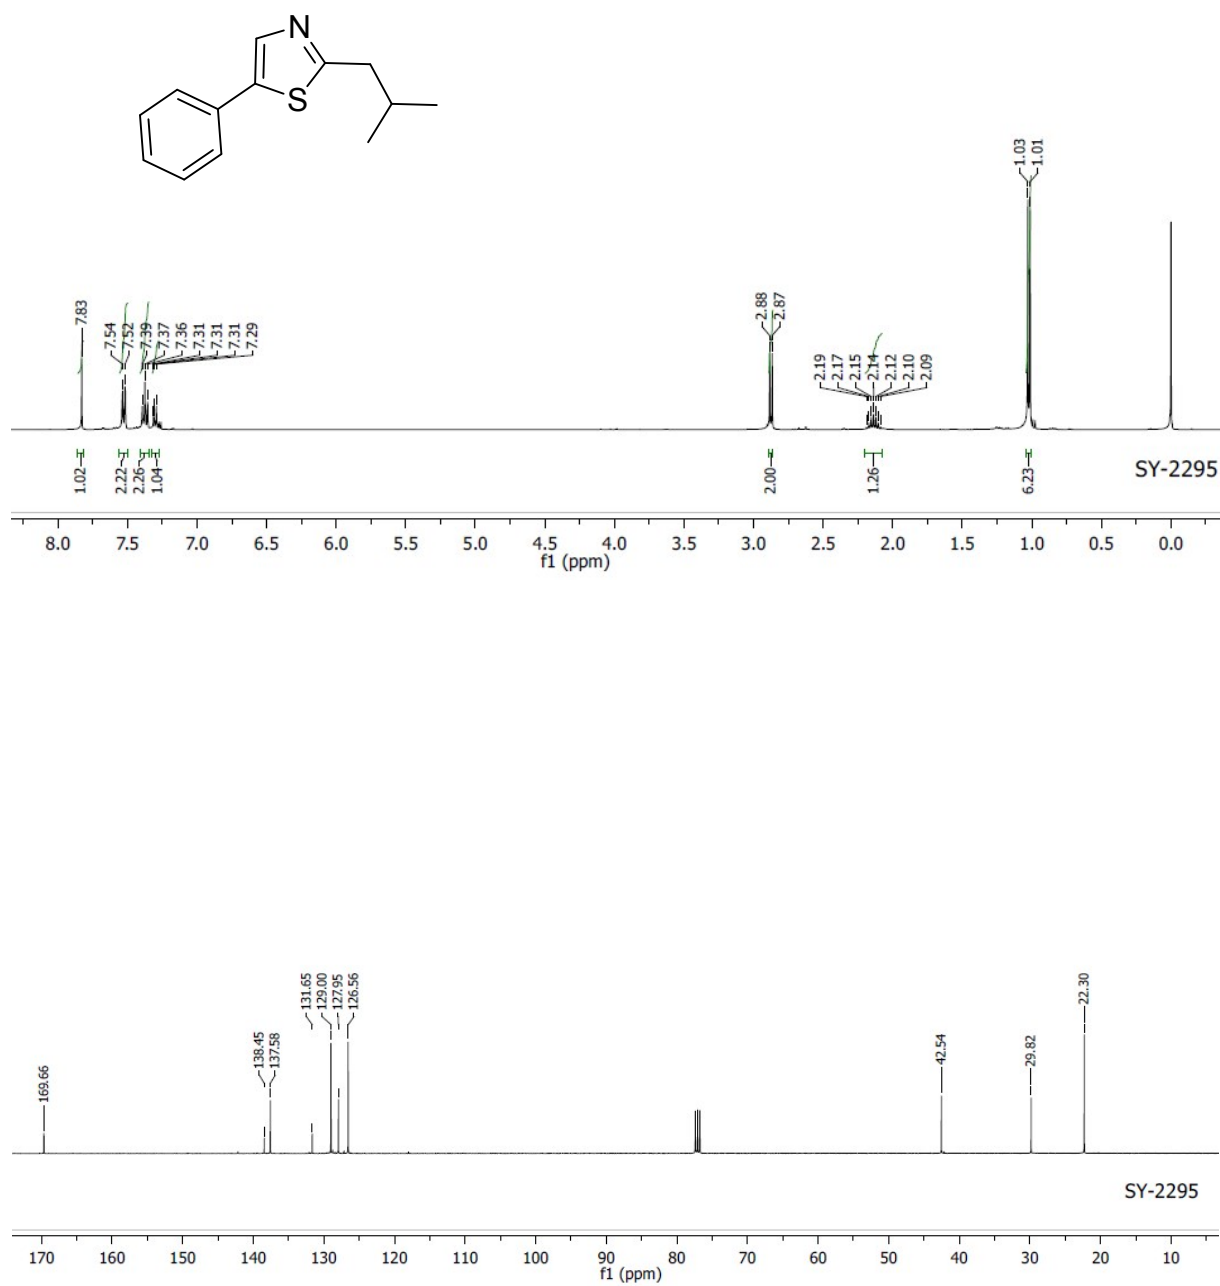

**Figure S6.** <sup>1</sup>H NMR and <sup>13</sup>C NMR spectra of **6a**

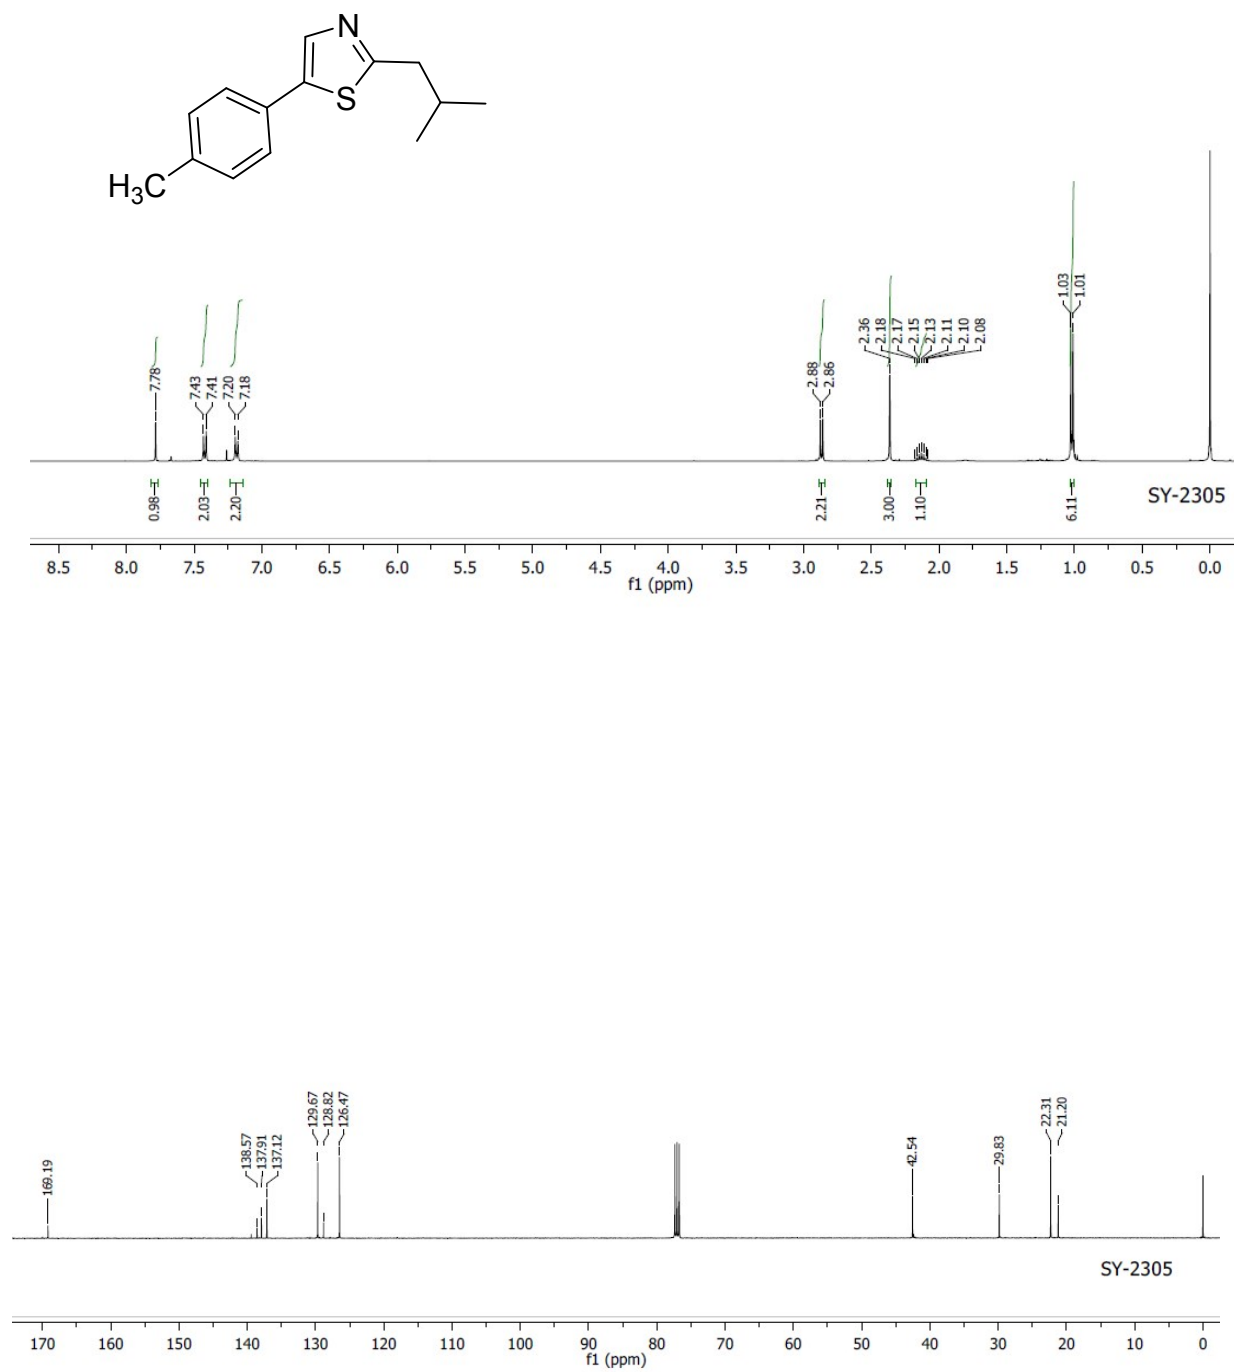

**Figure S7.**  $^1\text{H}$  NMR and  $^{13}\text{C}$  NMR spectra of **6b**



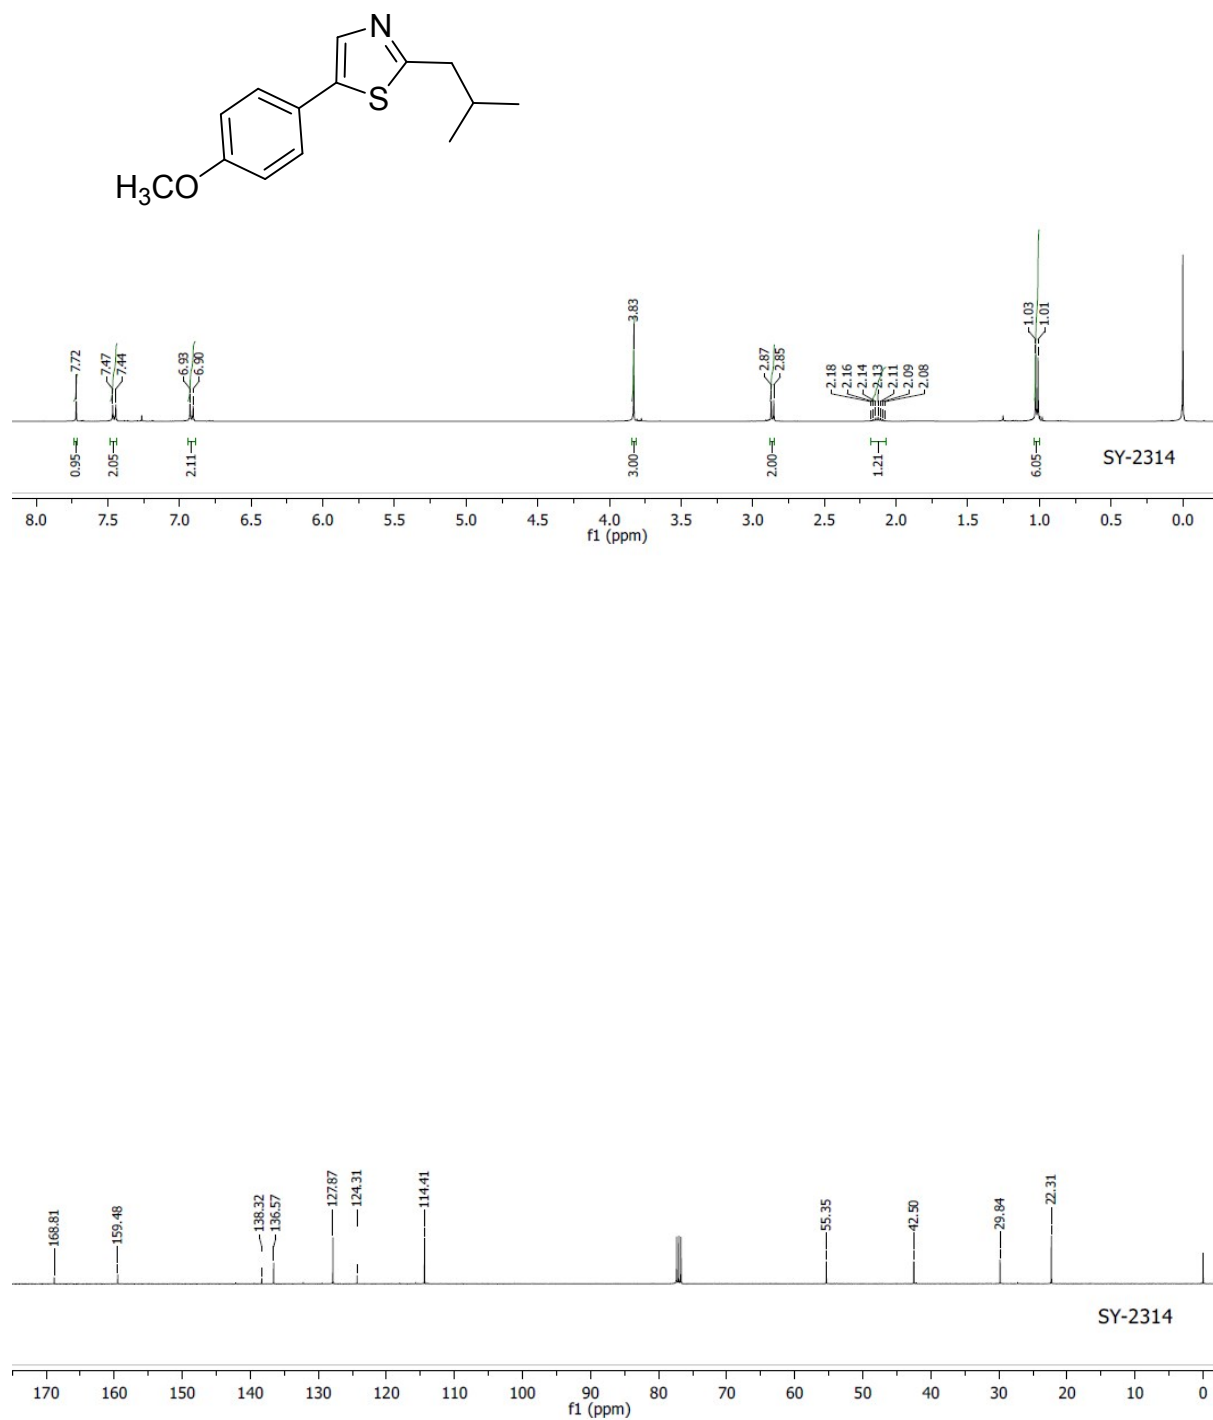

**Figure S8.** <sup>1</sup>H NMR and <sup>13</sup>C NMR spectra of **6c**

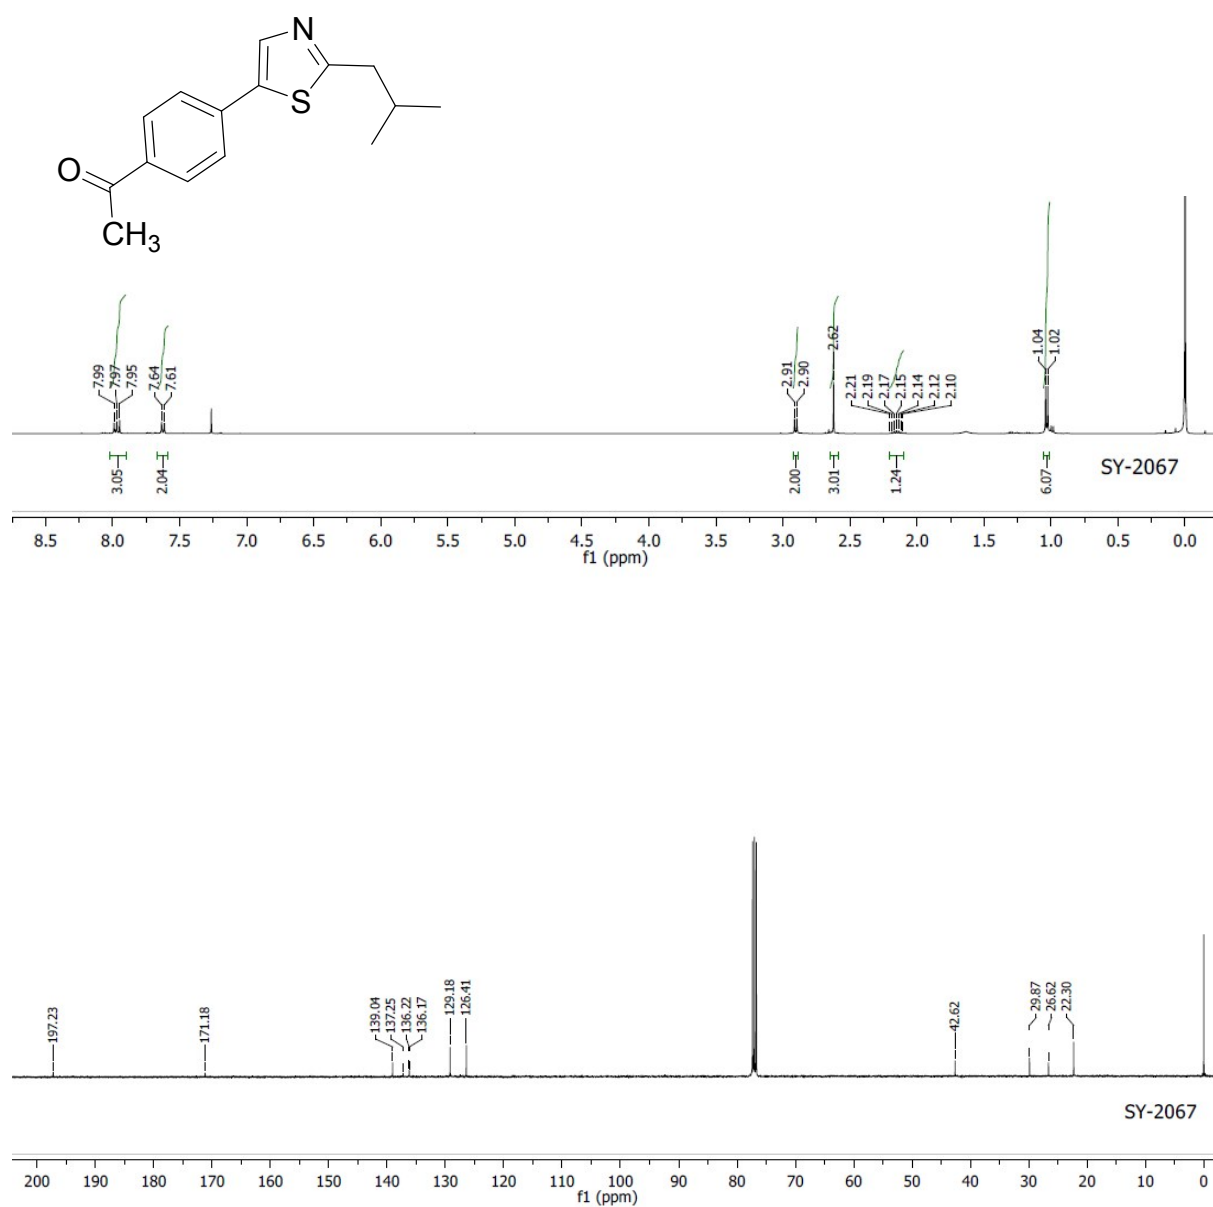

**Figure S9.** <sup>1</sup>H NMR and <sup>13</sup>C NMR spectra of **6d**

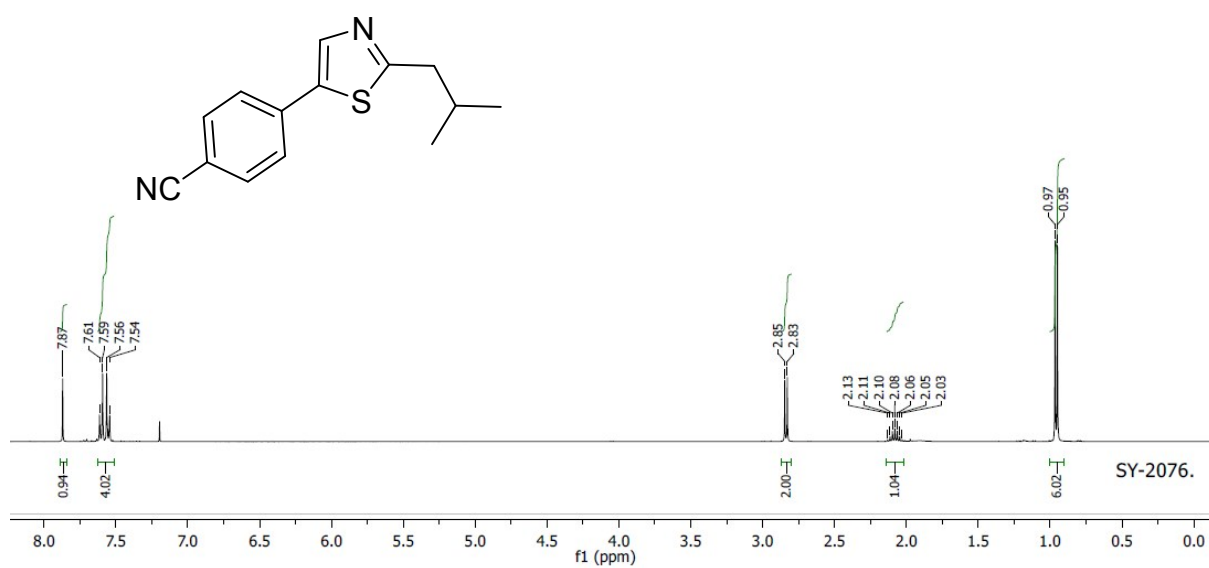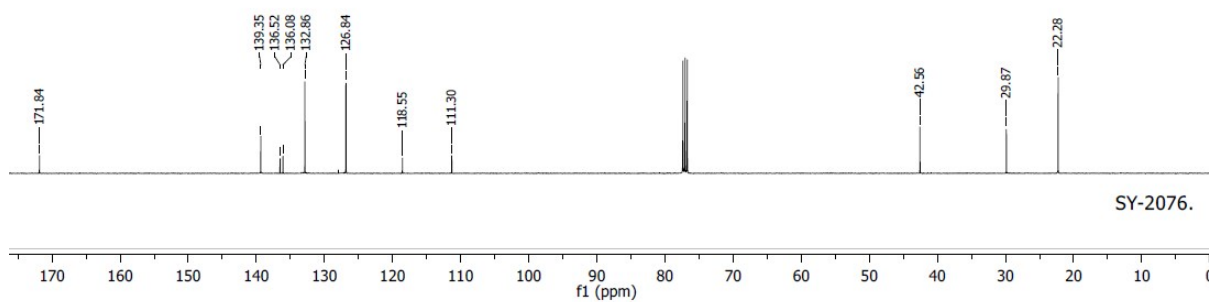

Figure S10. <sup>1</sup>H NMR and <sup>13</sup>C NMR spectra of **6e**

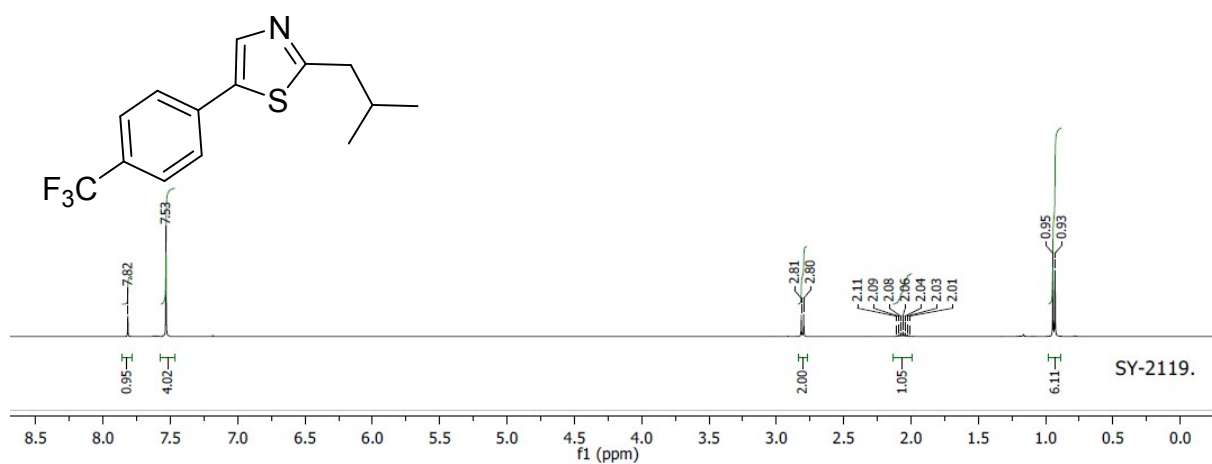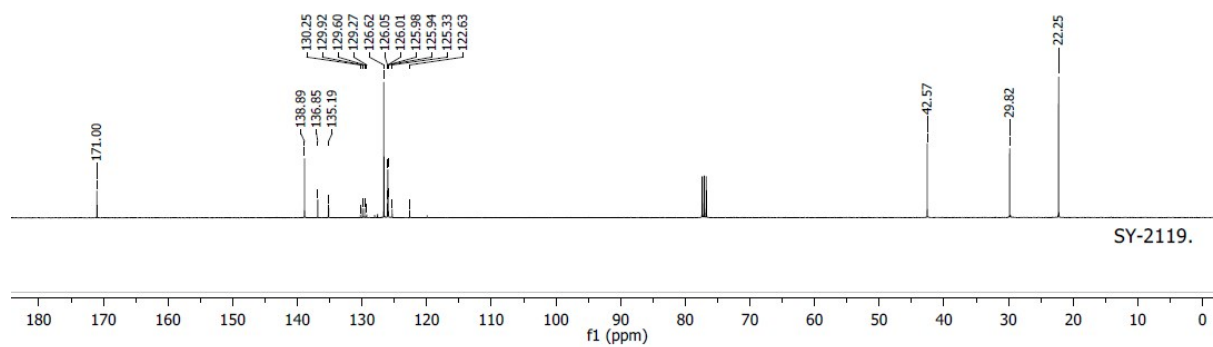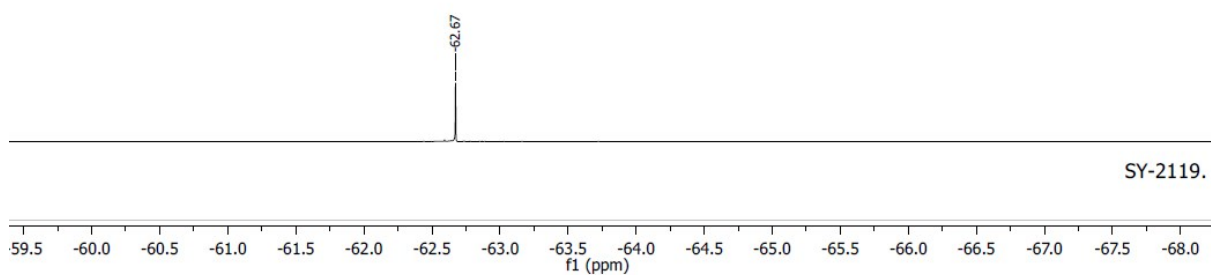

Figure S11. <sup>1</sup>H NMR, <sup>13</sup>C NMR and <sup>19</sup>F NMR spectra of **6f**

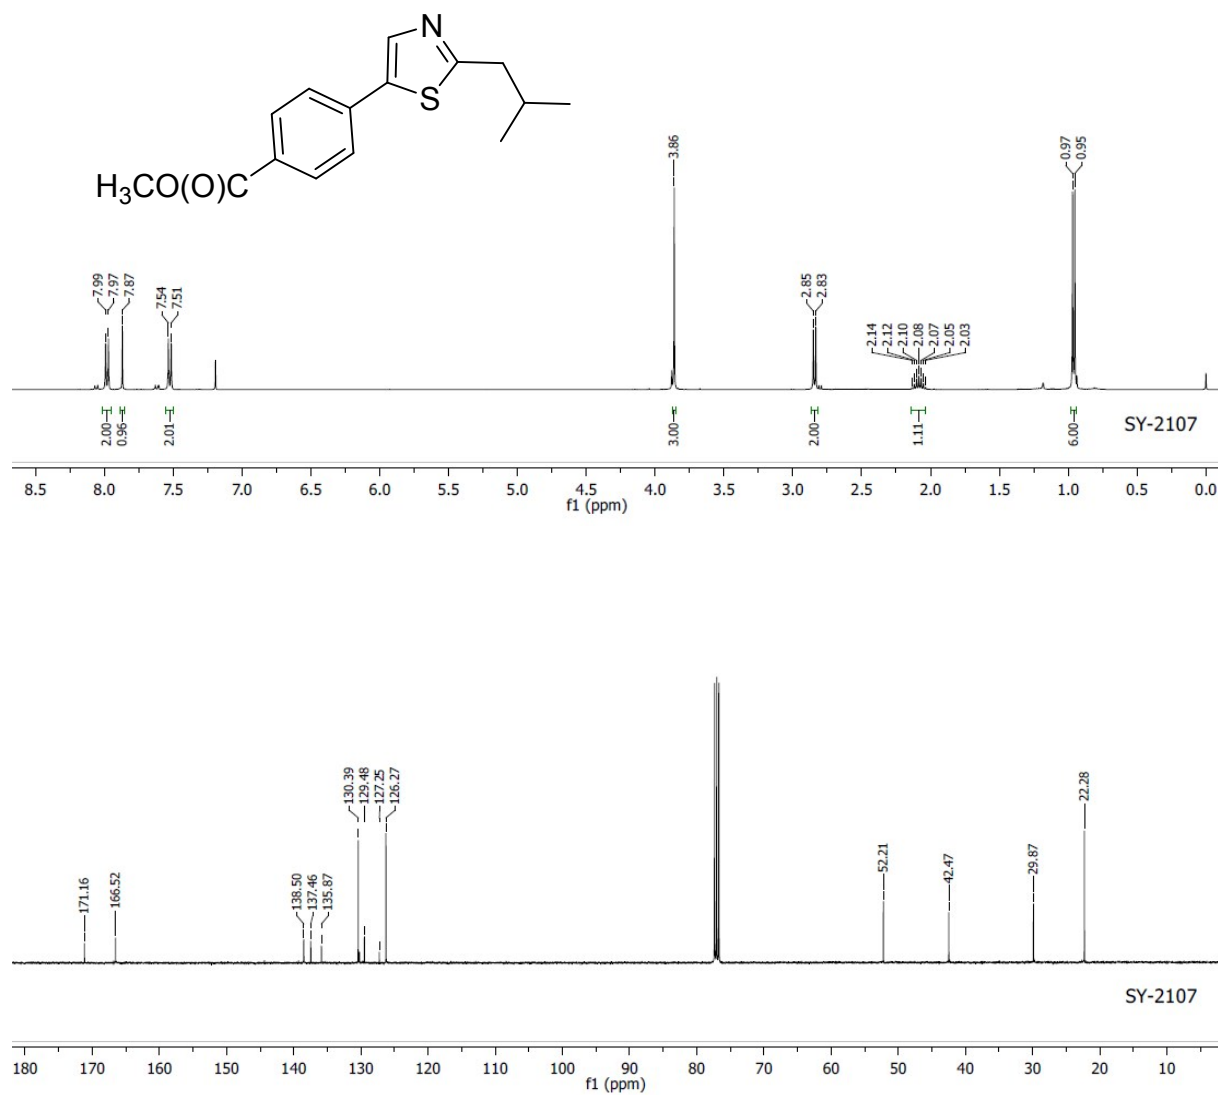

**Figure S12.** <sup>1</sup>H NMR and <sup>13</sup>C NMR spectra of **6g**

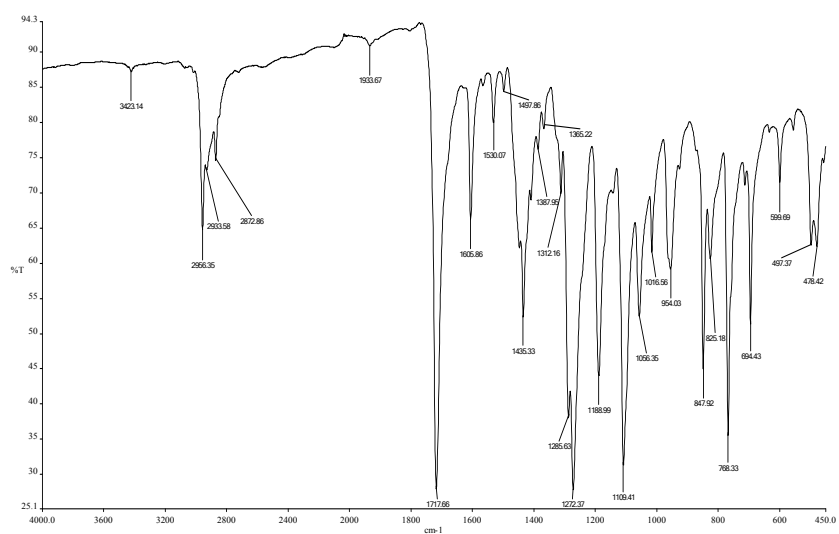

Figure S13. IR spectra of 6g

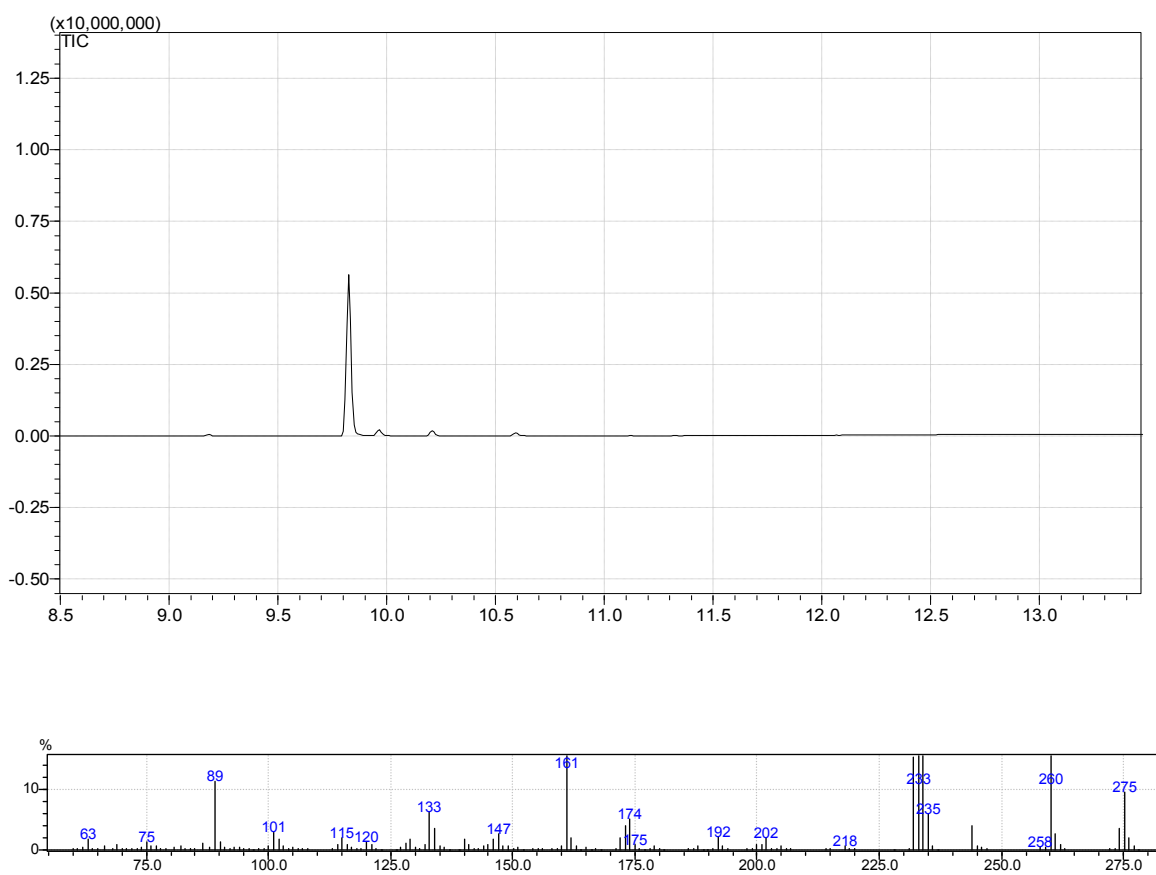

Figure S14. GC-MS spectra of 6g

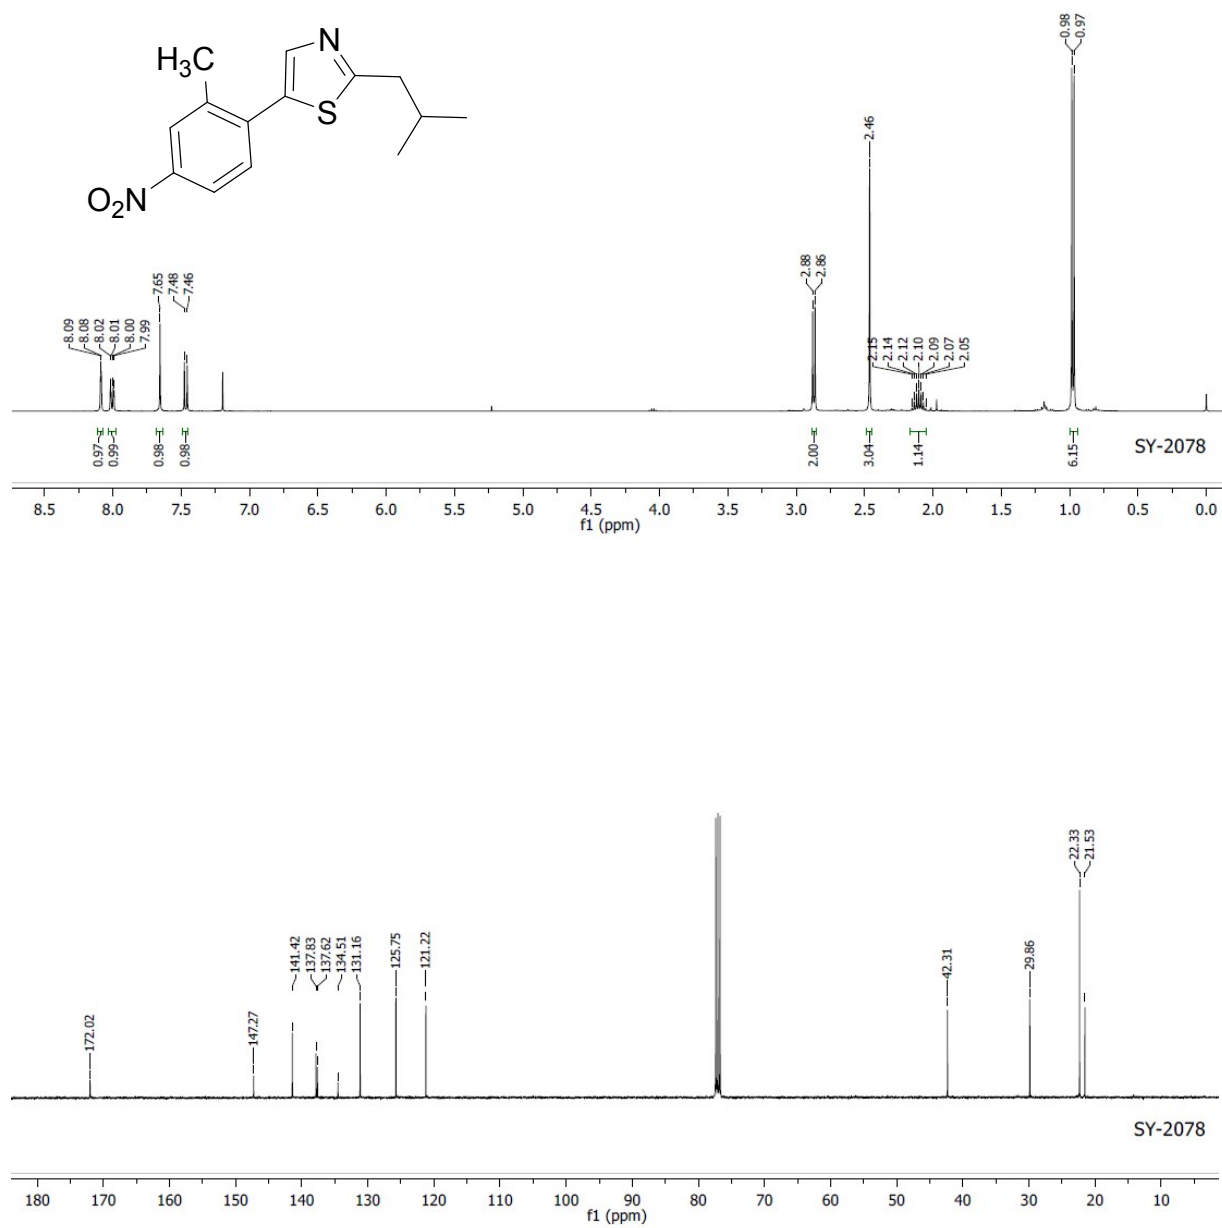

**Figure S15.** <sup>1</sup>H NMR and <sup>13</sup>C NMR spectra of **6h**

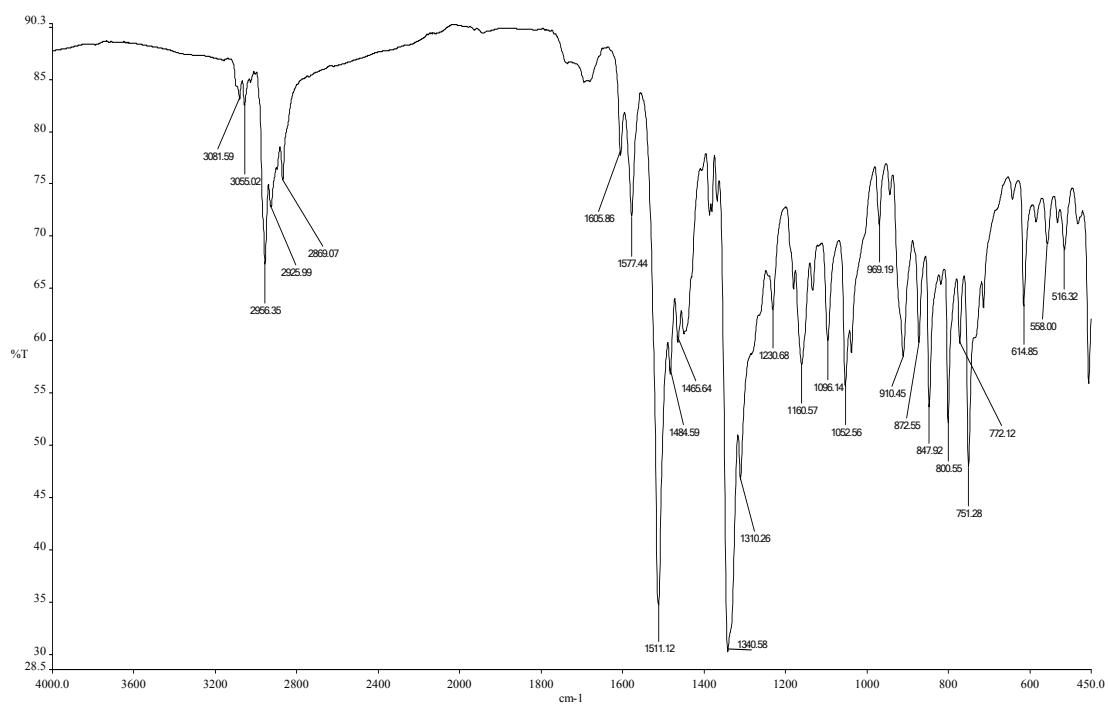

Figure S16. IR spectra of 6h

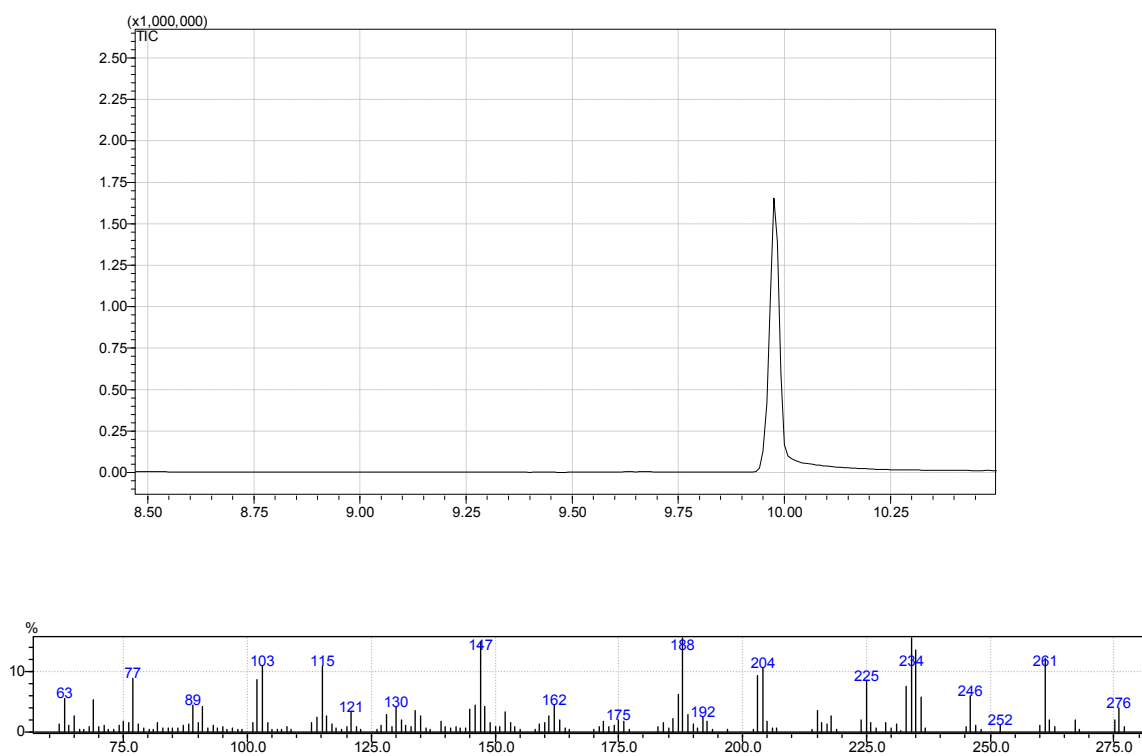

Figure S17. GC-MS spectra of 6h



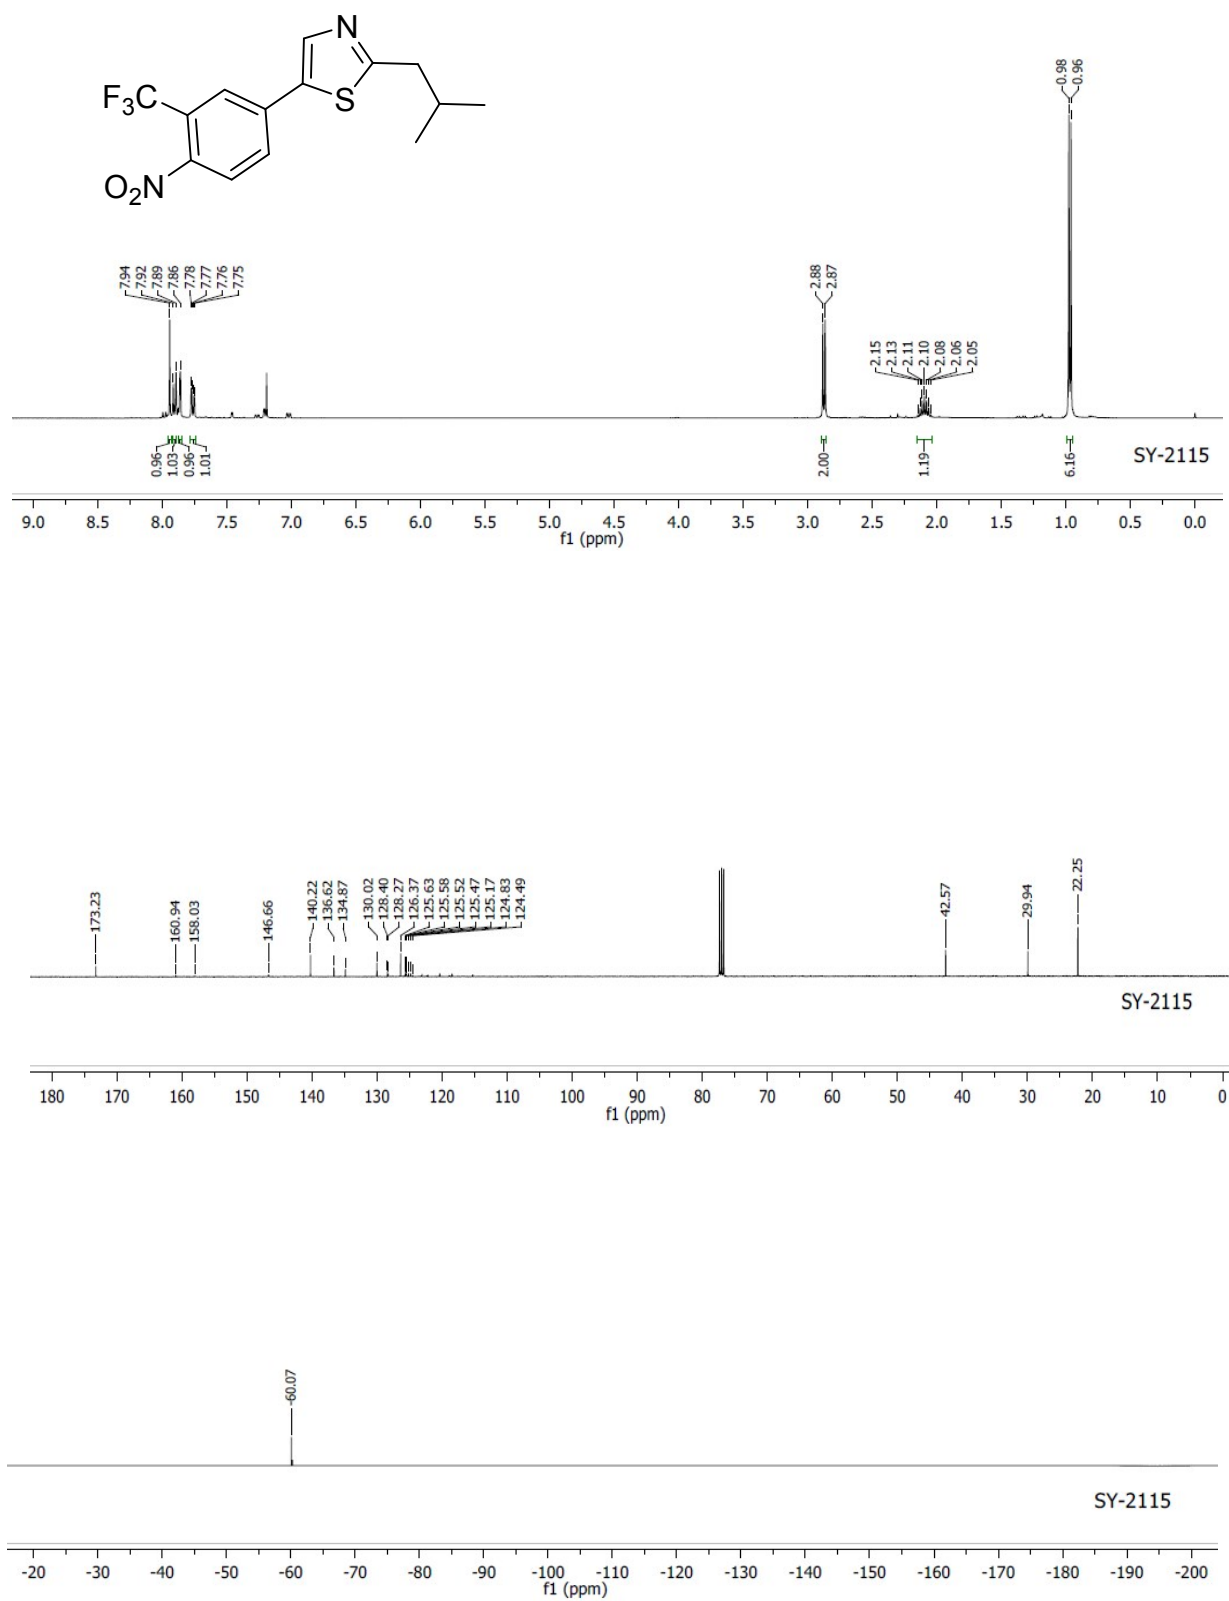

**Figure S18.** <sup>1</sup>H NMR, <sup>13</sup>C NMR and <sup>19</sup>F NMR spectra of **6i**

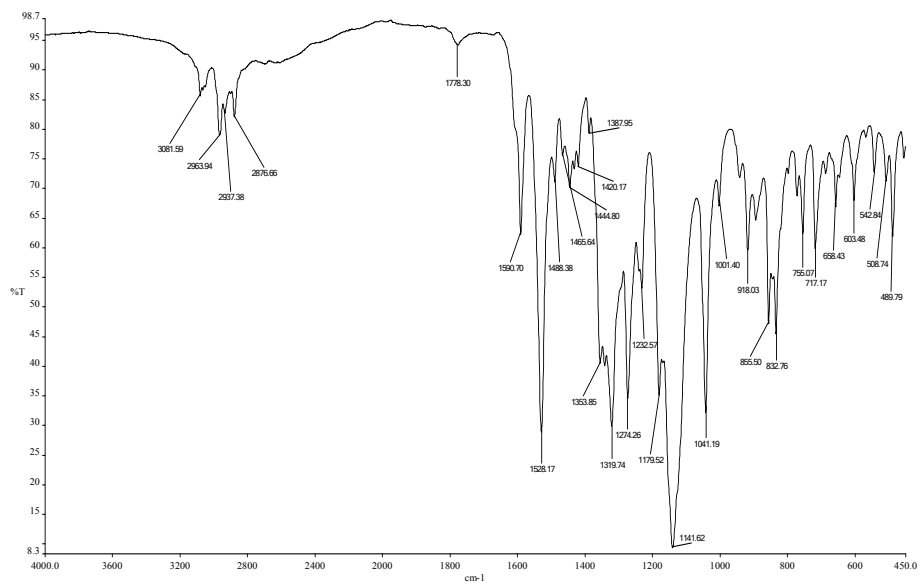

Figure S19. IR spectra of 6i

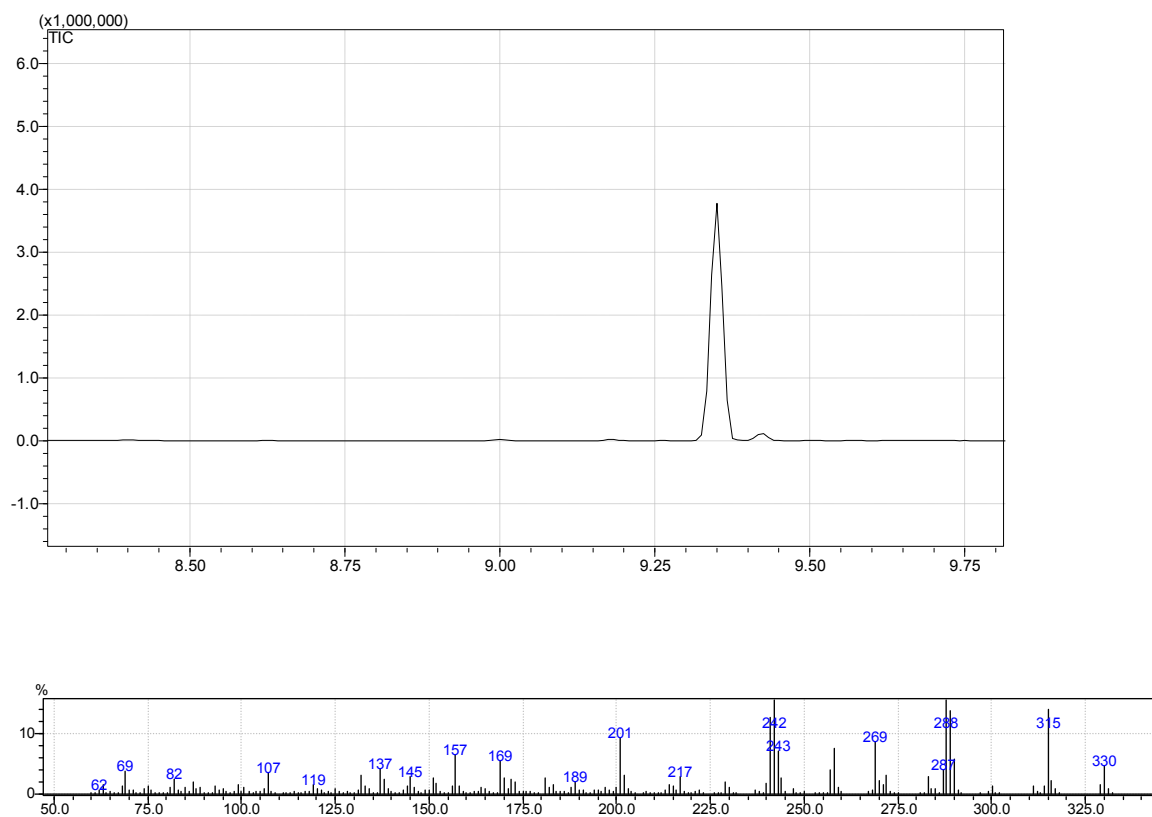

Figure S20. GC-MS spectra of 6i

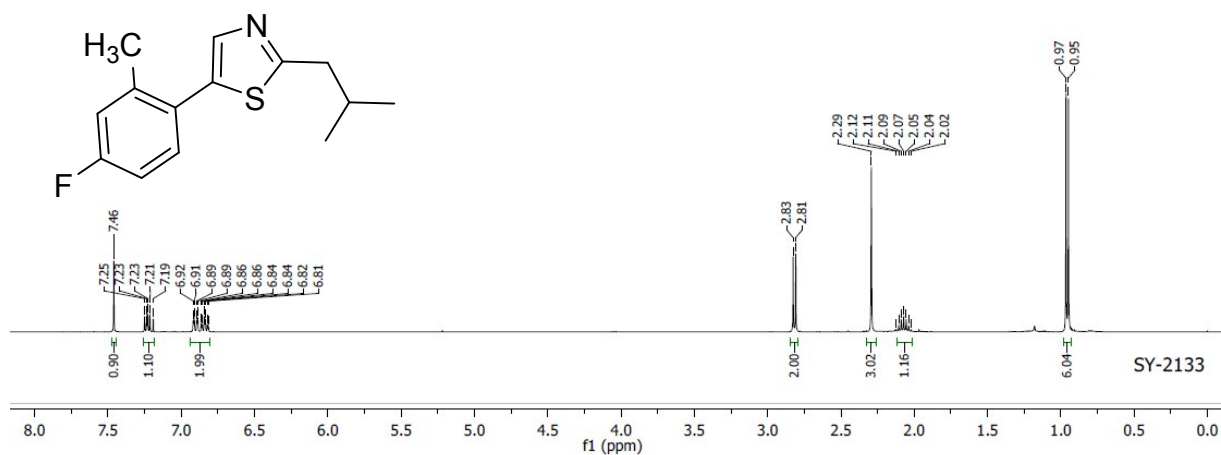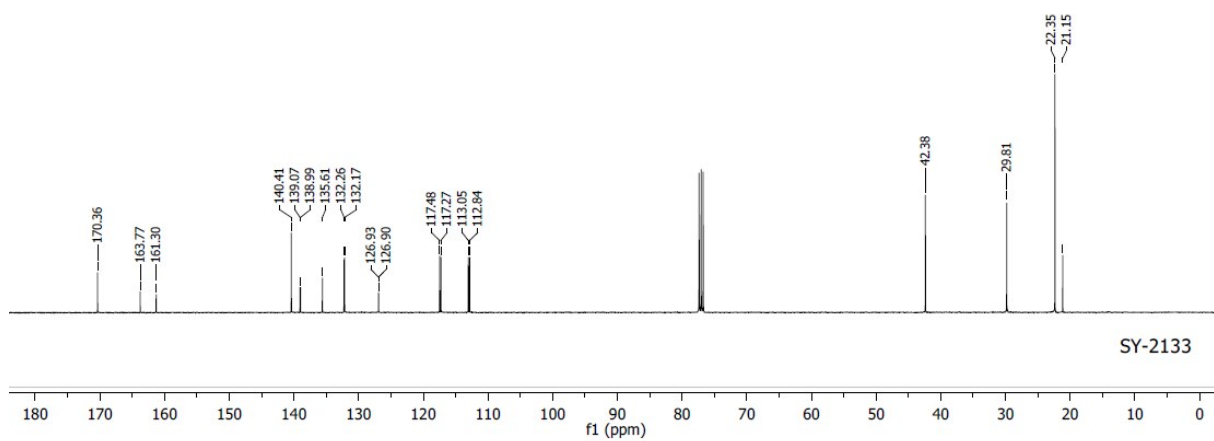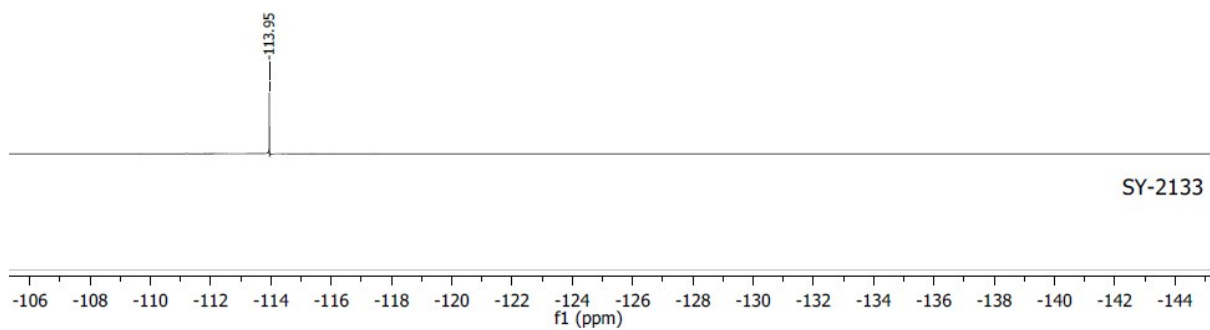

Figure S21.  $^1\text{H}$  NMR,  $^{13}\text{C}$  NMR and  $^{19}\text{F}$  NMR spectra of **6j**

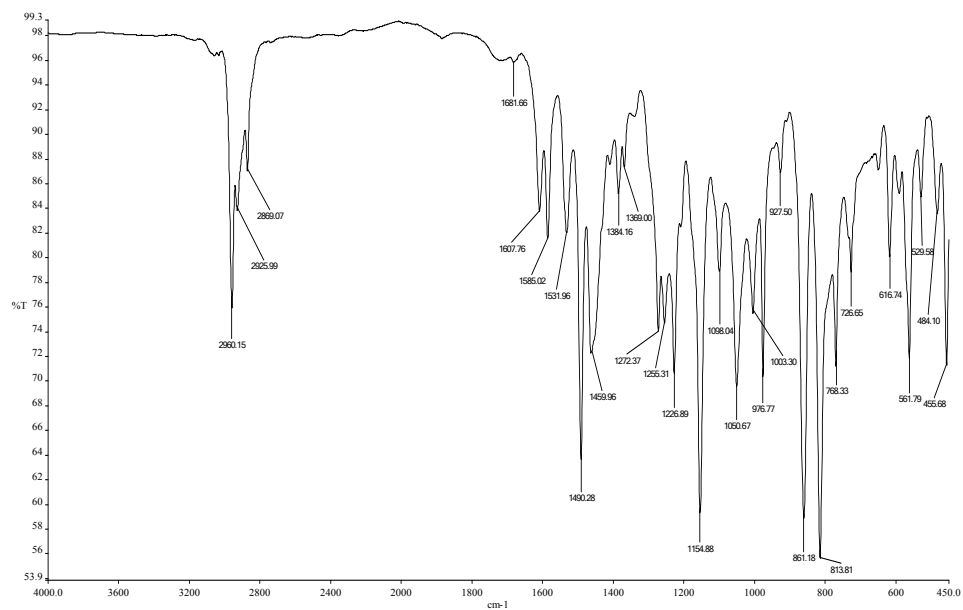

Figure S22. IR spectra of 6j

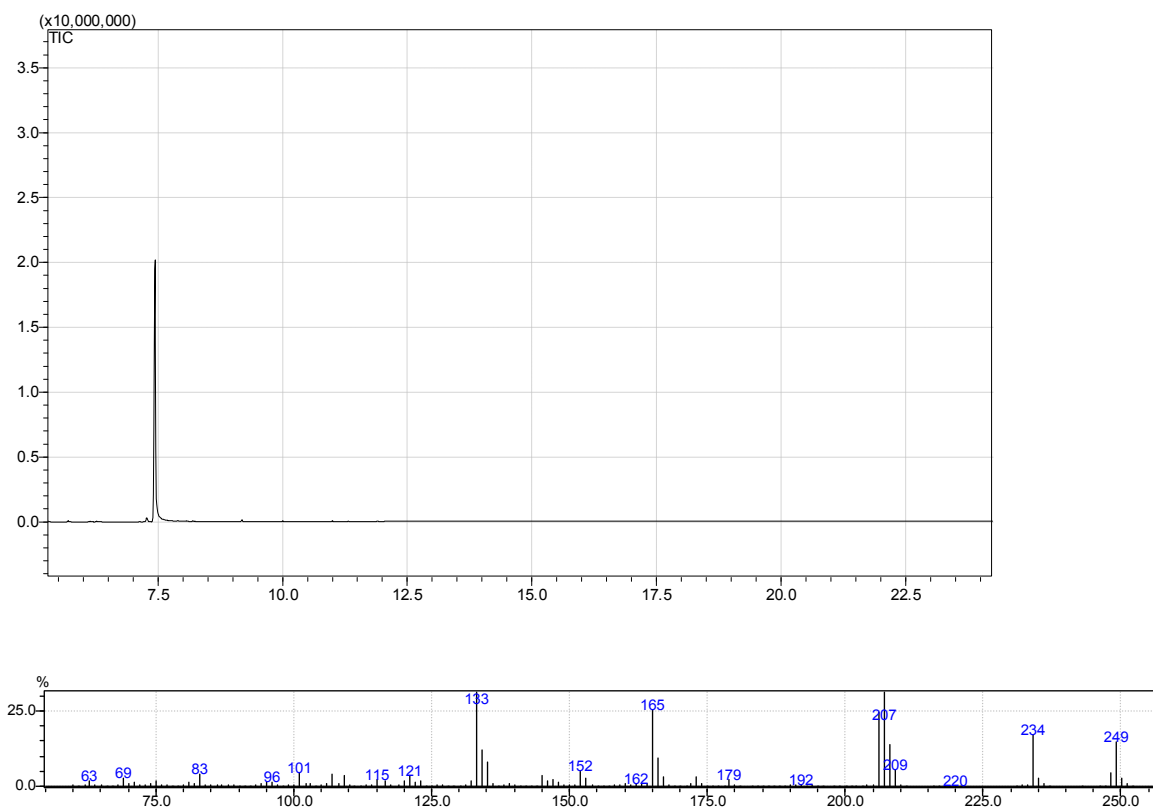

Figure S23. GC-MS spectra of 6j

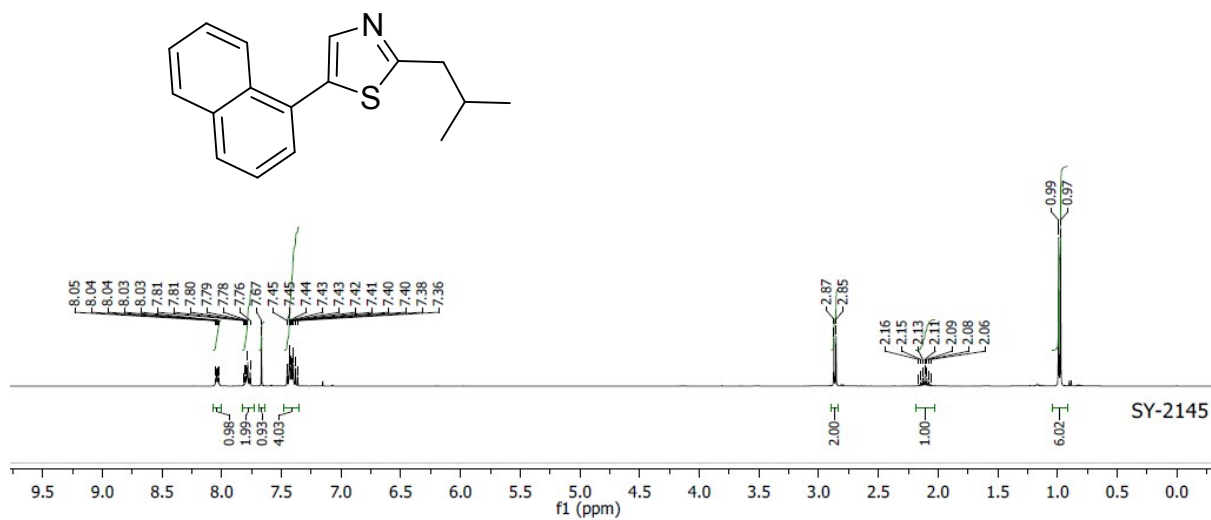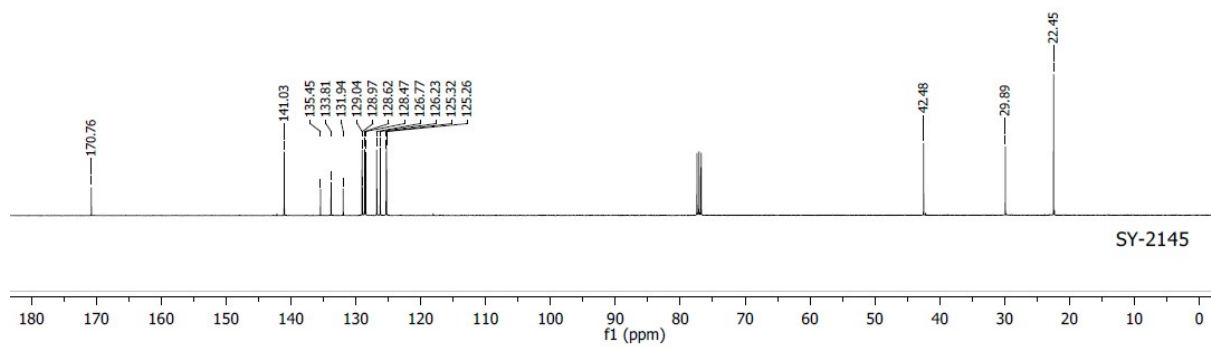

Figure S24. <sup>1</sup>H NMR and <sup>13</sup>C NMR spectra of **61**

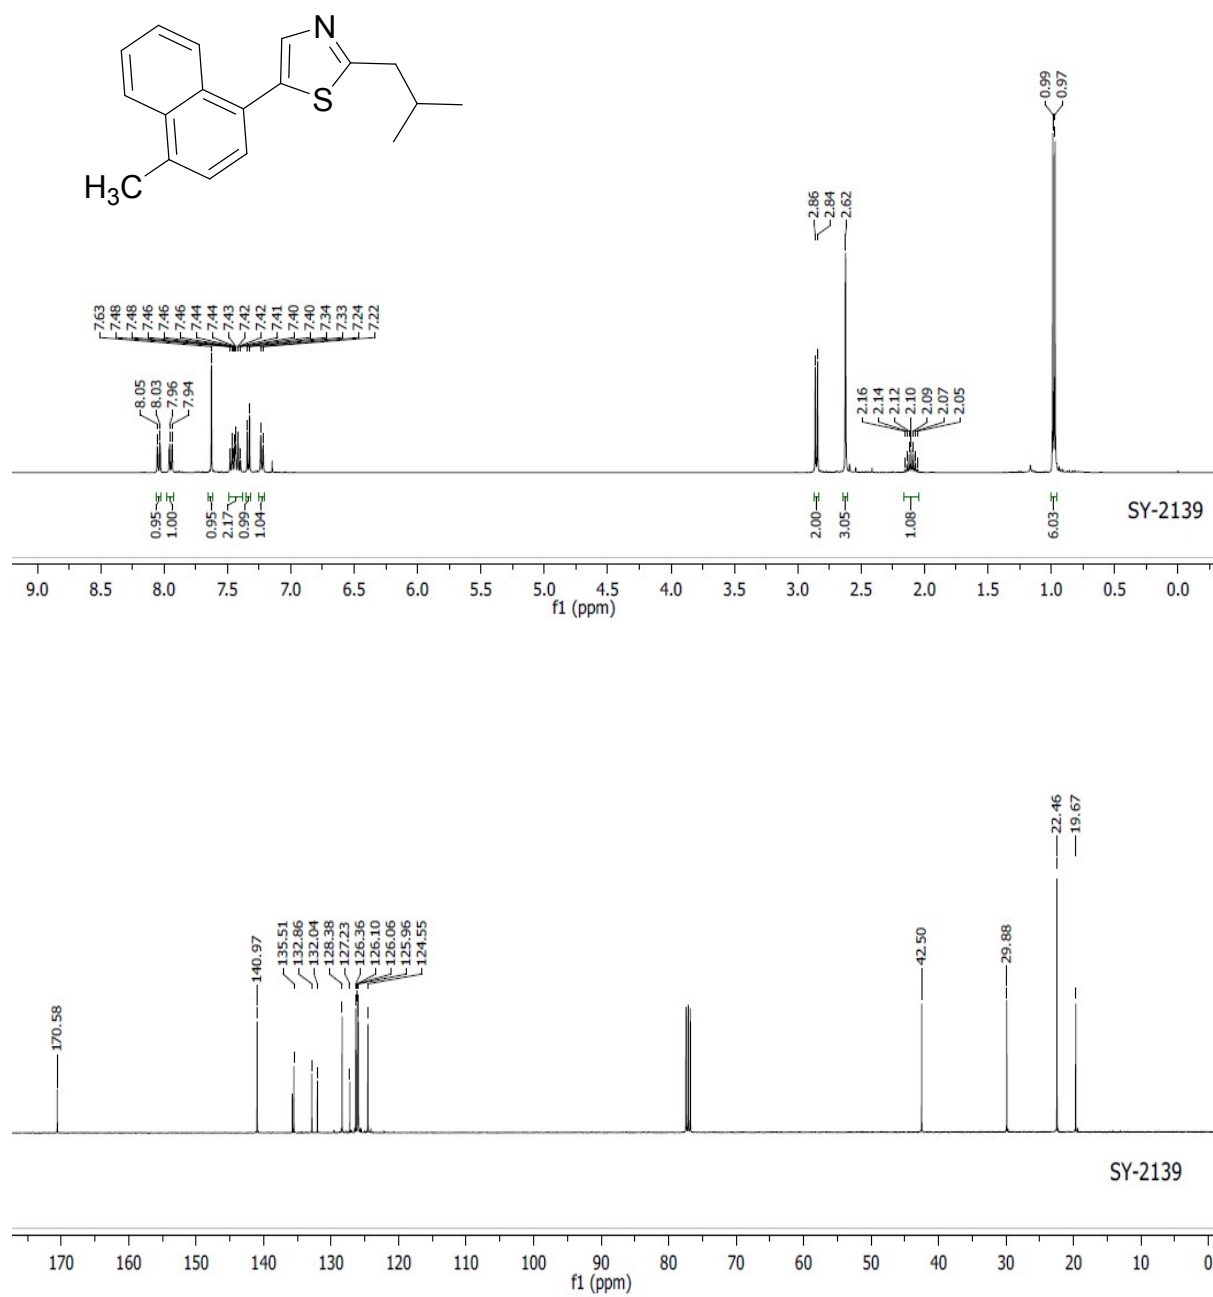

Figure S25. <sup>1</sup>H NMR and <sup>13</sup>C NMR spectra of **6m**

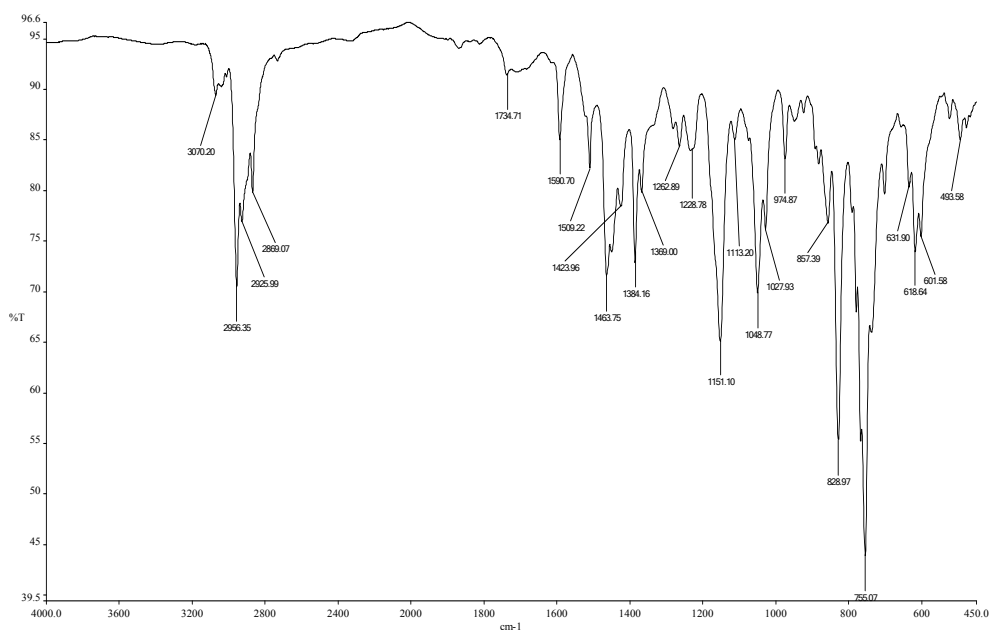

Figure S26. IR spectra of 6m

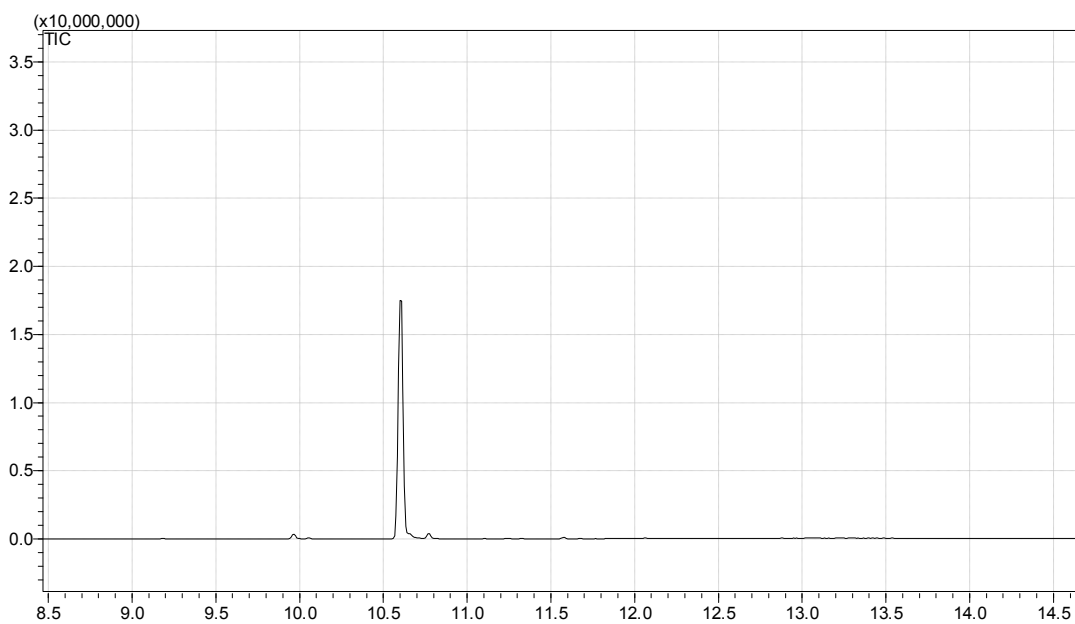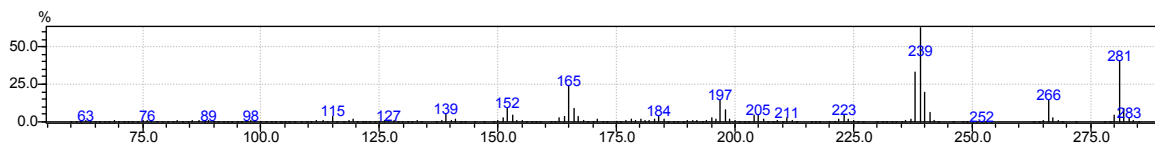

Figure S27. GC-MS spectra of 6m

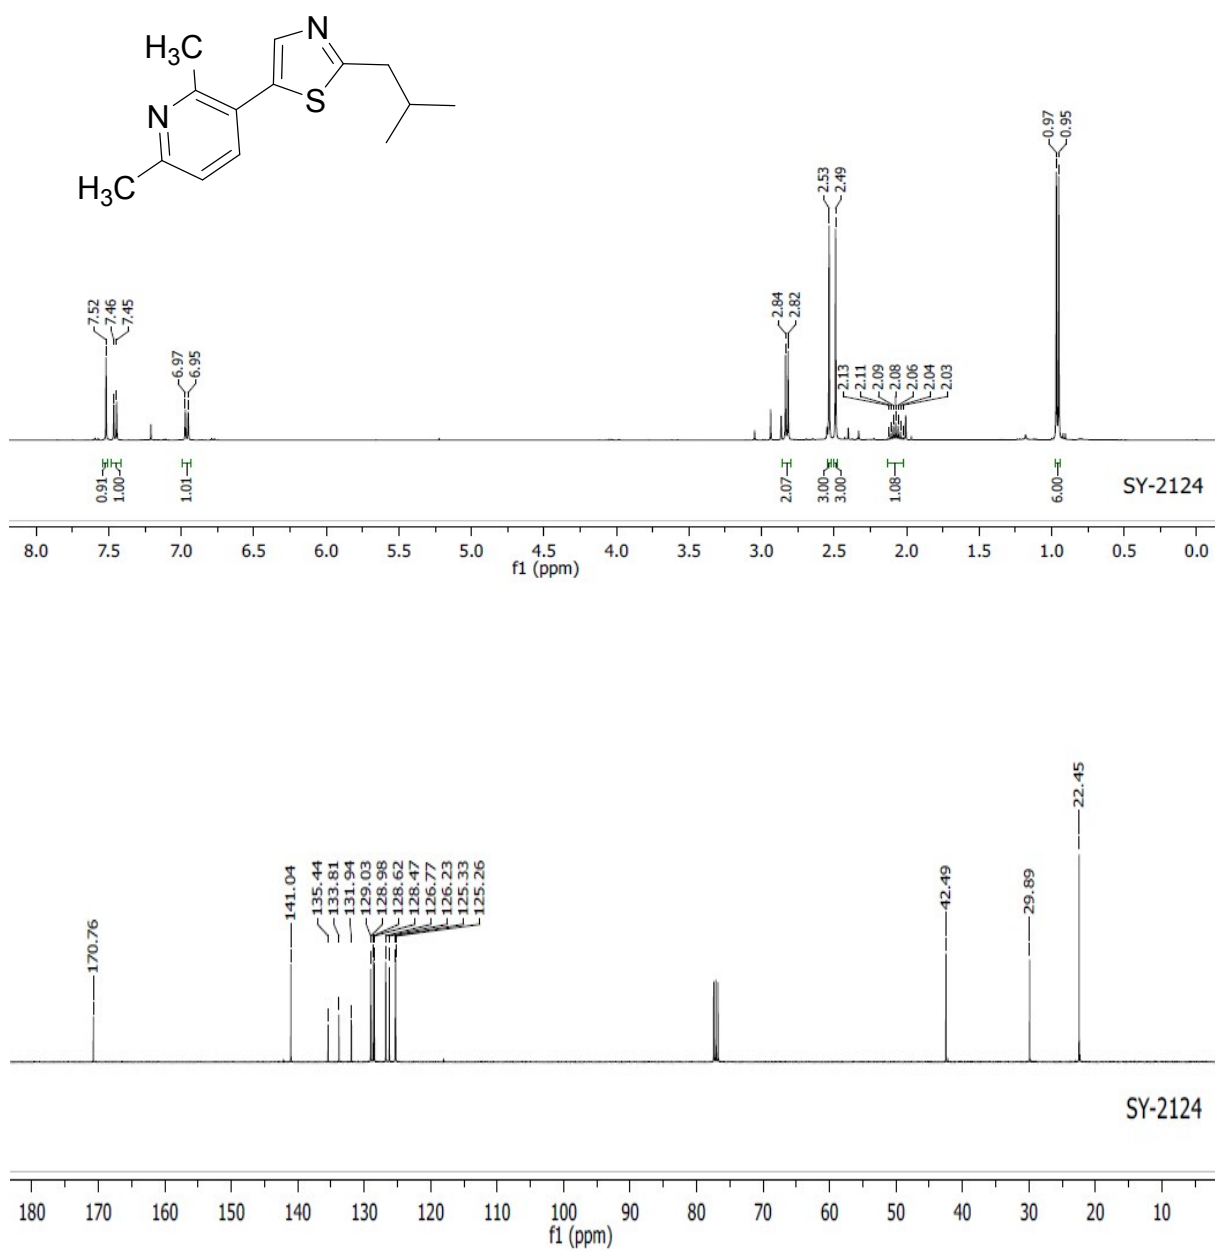

**Figure S28.** <sup>1</sup>H NMR and <sup>13</sup>C NMR spectra of **6n**



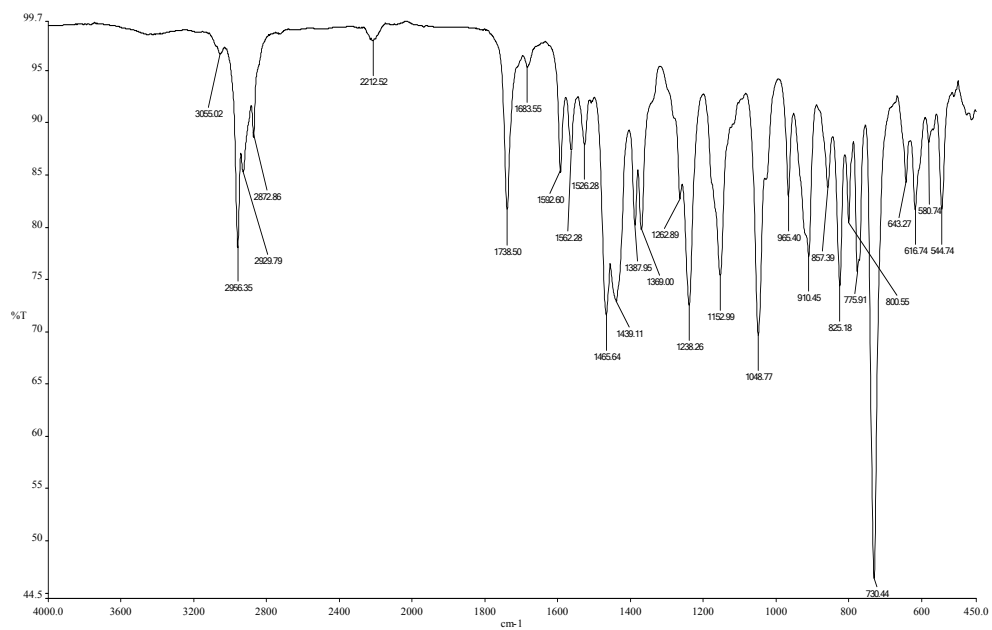

Figure S29. IR spectra of 6n

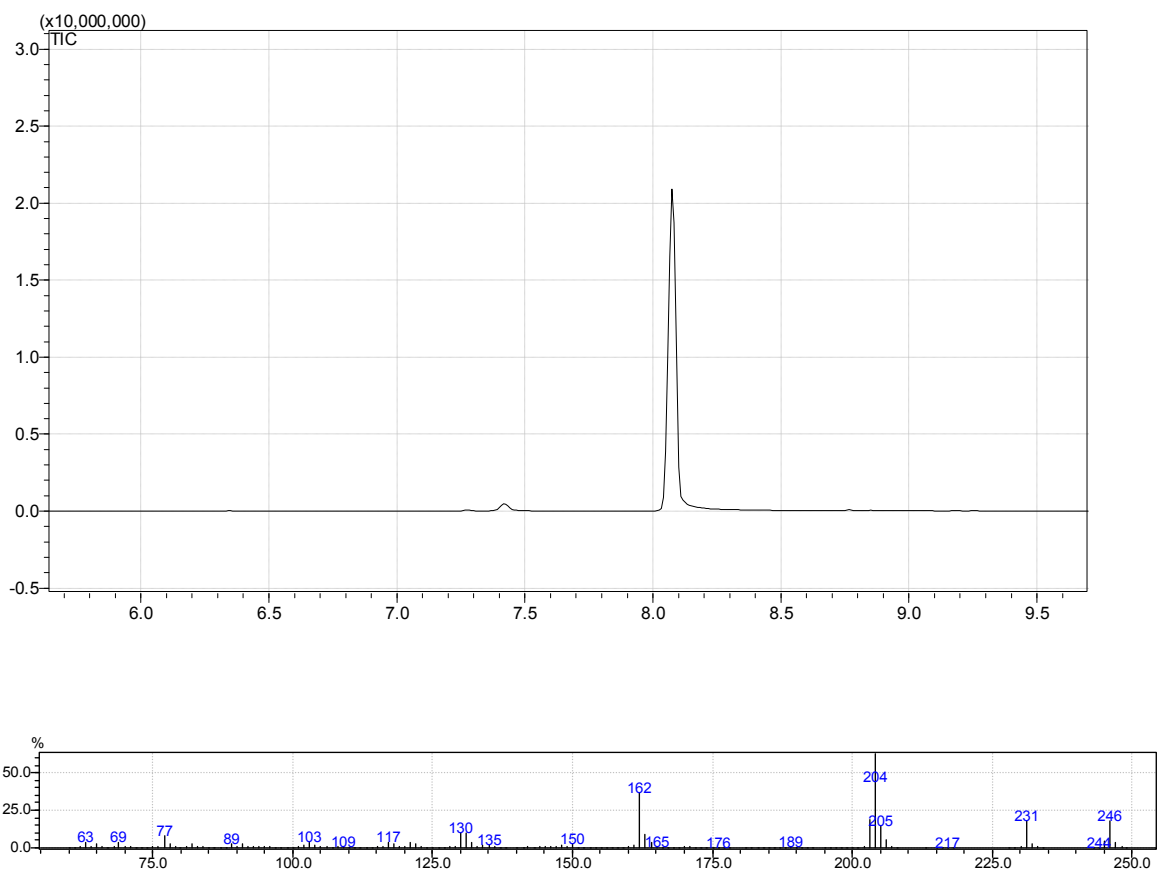

Figure S30. GC-MS spectra of 6n

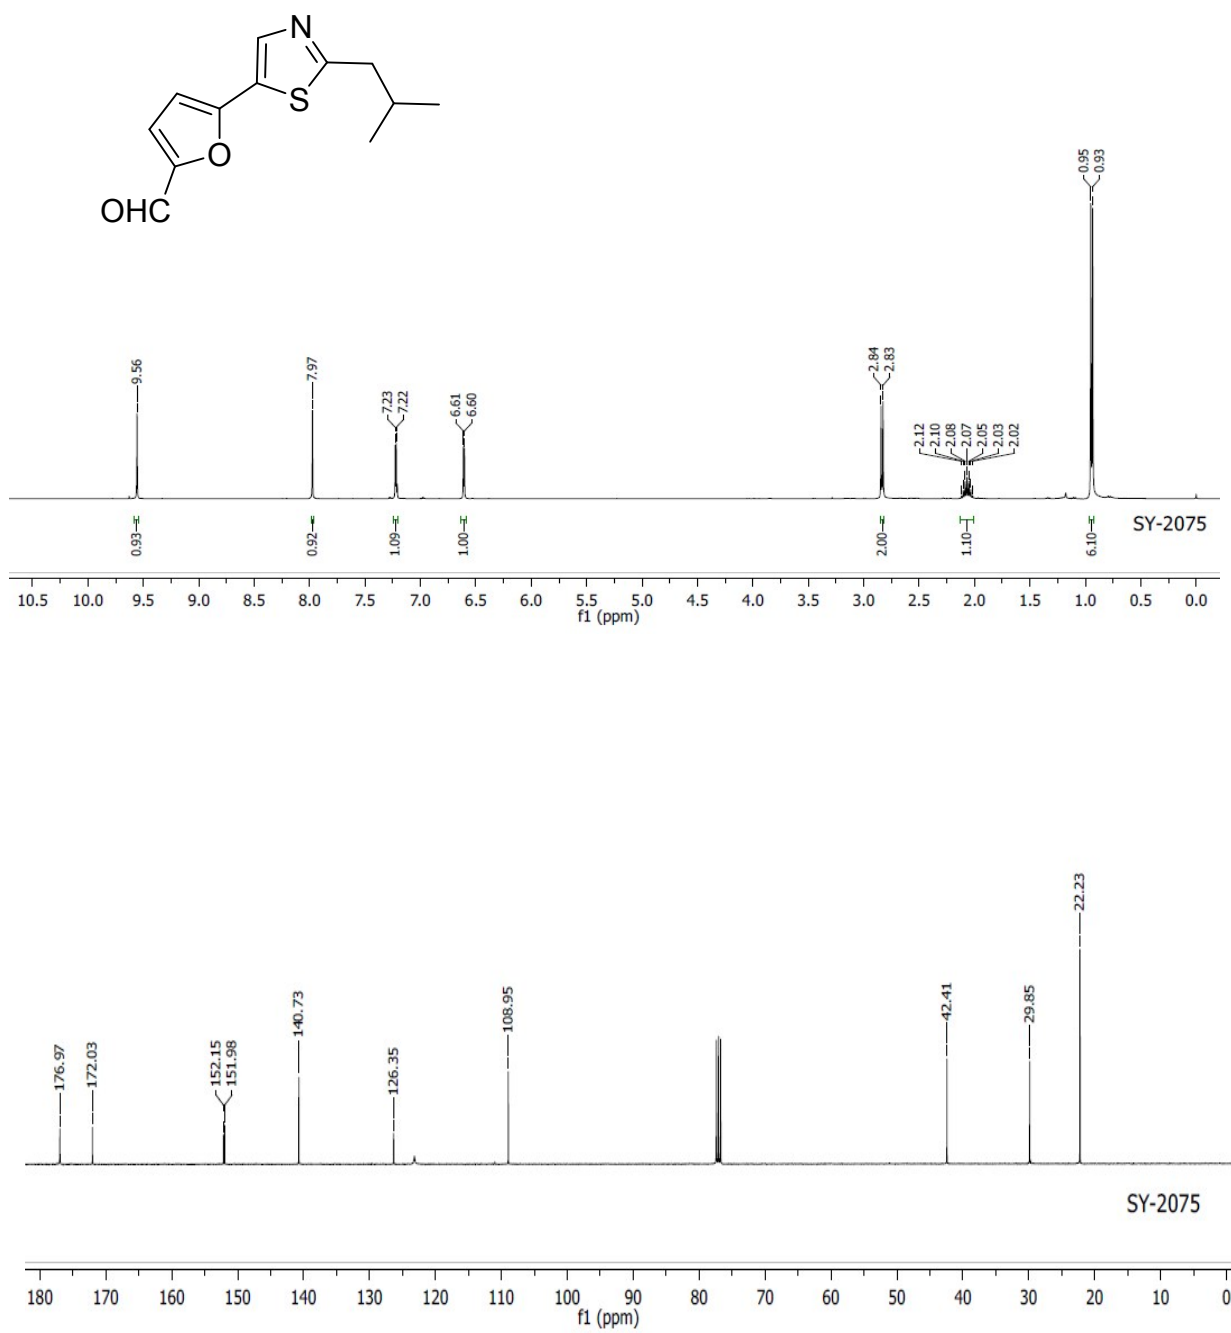

Figure S31.  $^1\text{H}$  NMR and  $^{13}\text{C}$  NMR spectra of **60**

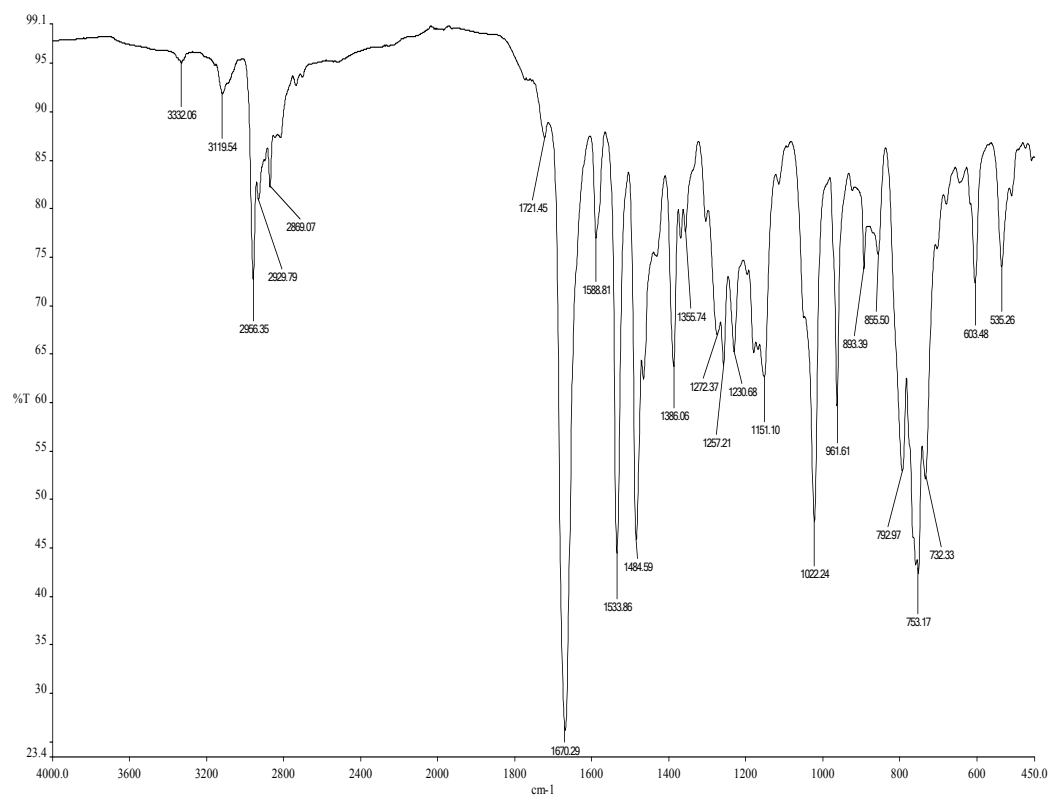

Figure S32. IR spectra of 60

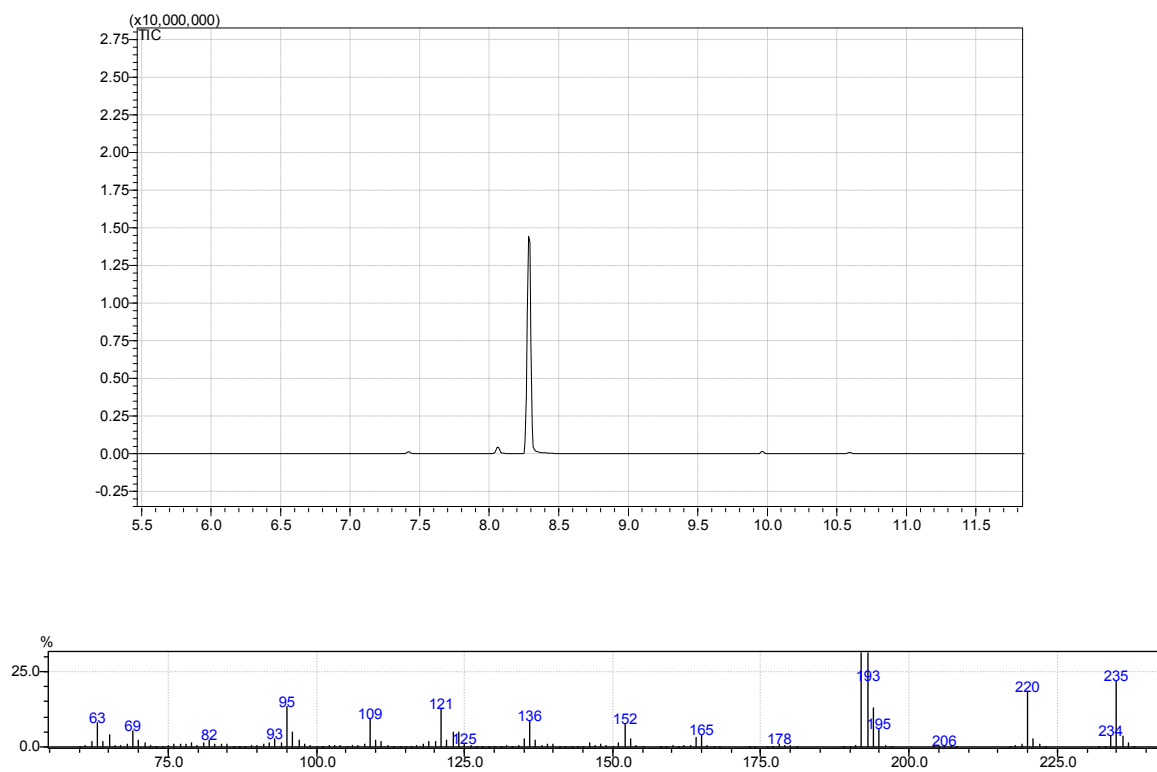

Figure S33. GC-MS spectra of 60

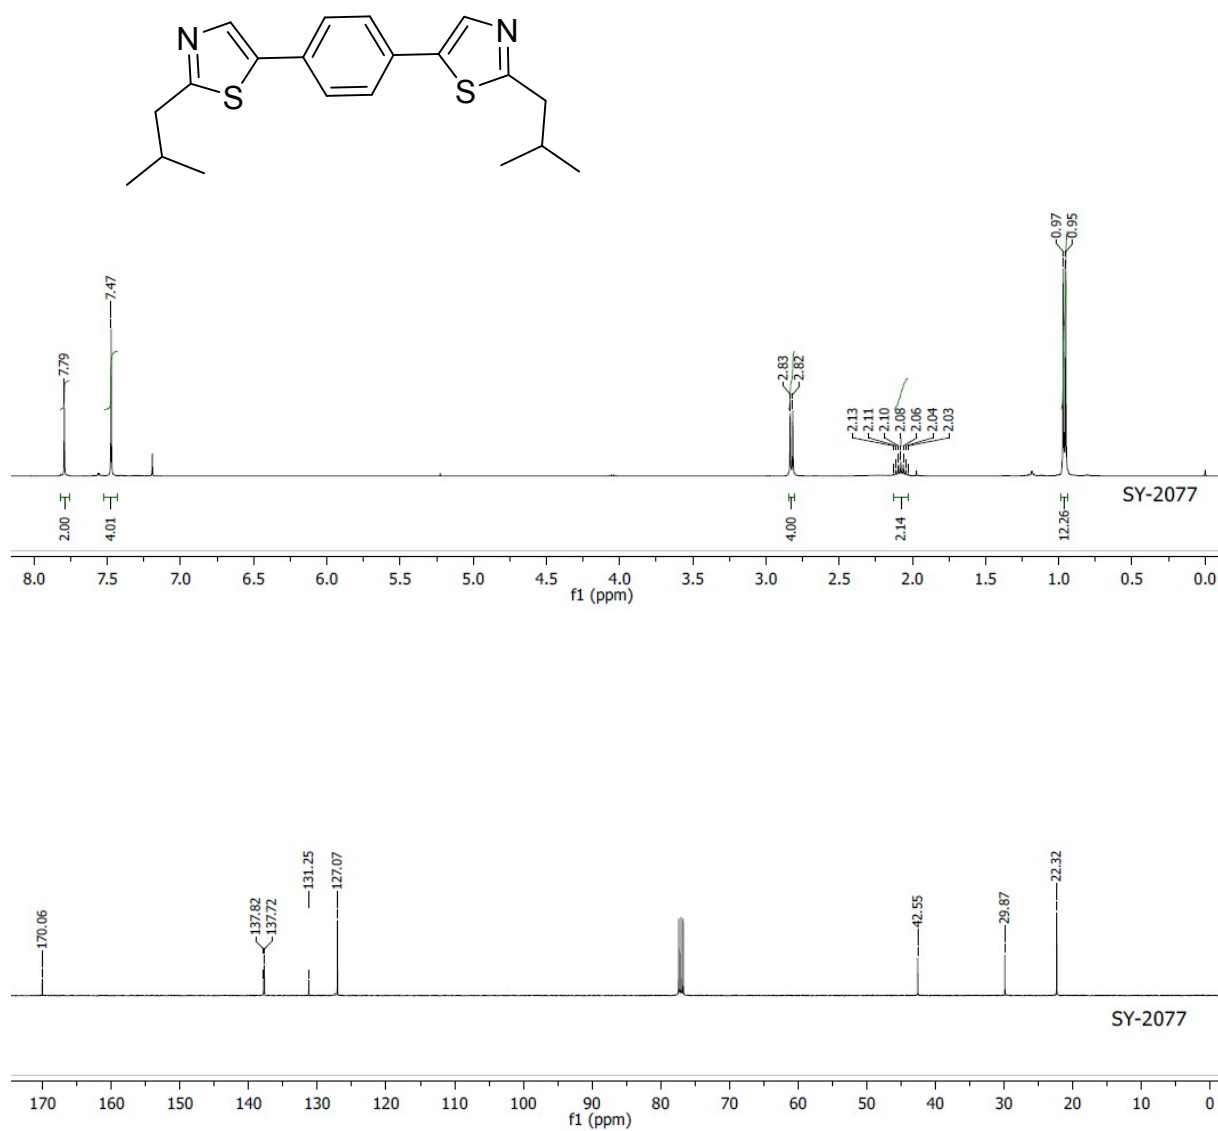

**Figure S34.** <sup>1</sup>H NMR and <sup>13</sup>C NMR spectra of **6p**

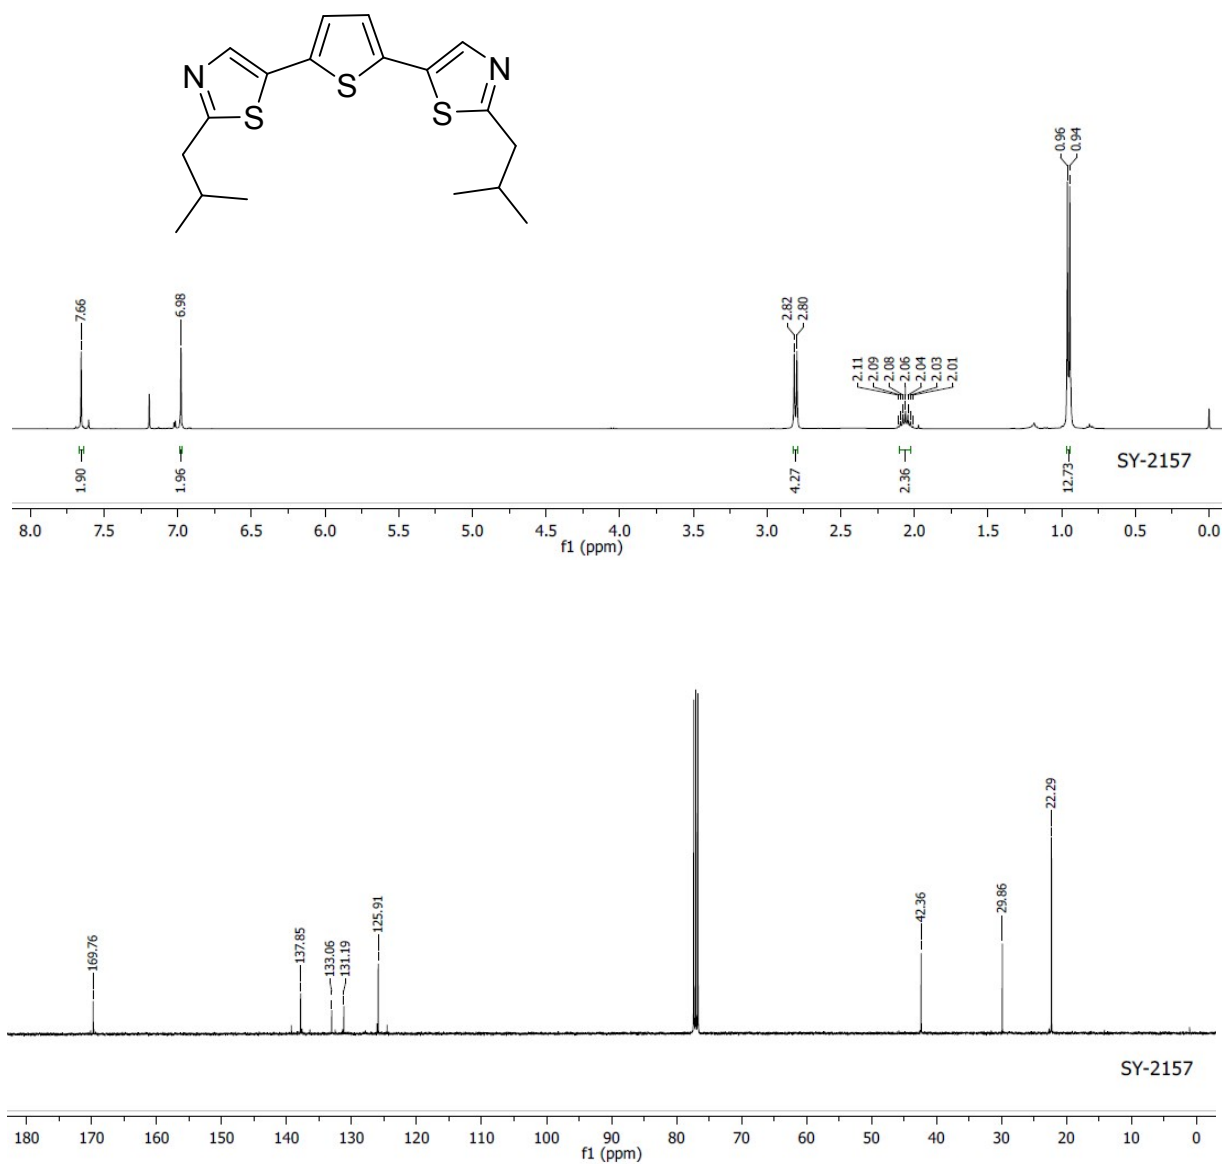

Figure S35. <sup>1</sup>H NMR and <sup>13</sup>C NMR spectra of 6r

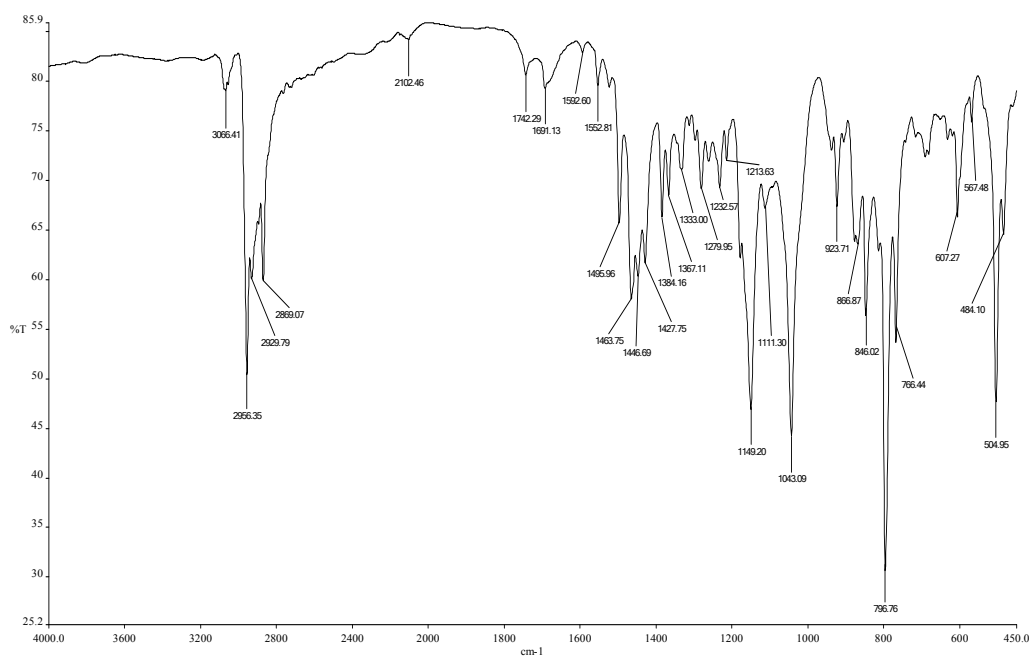

Figure S36. IR spectra of 6r

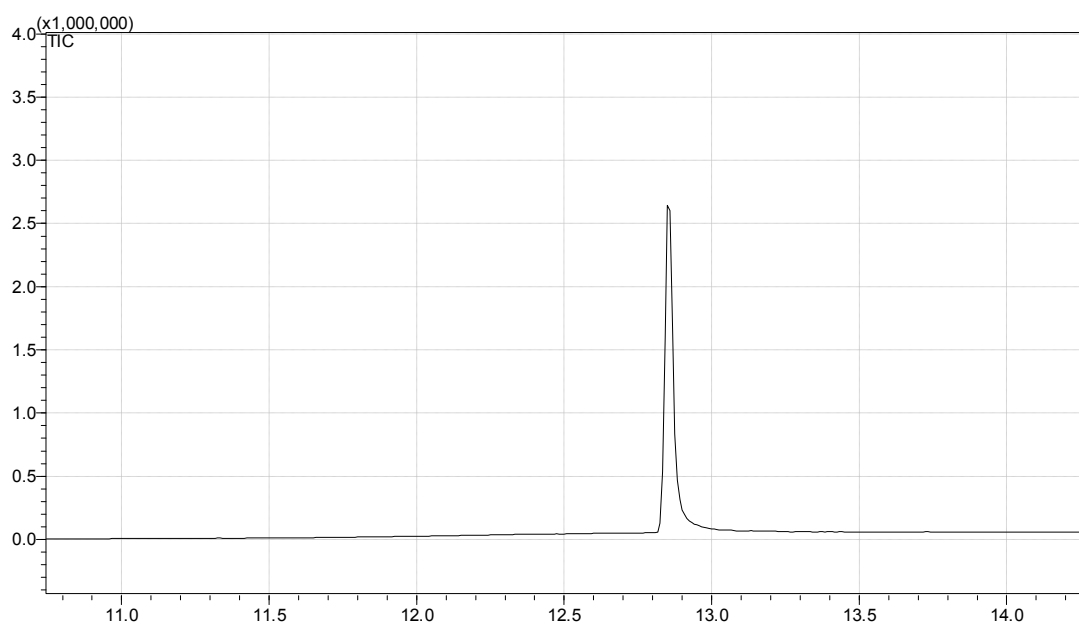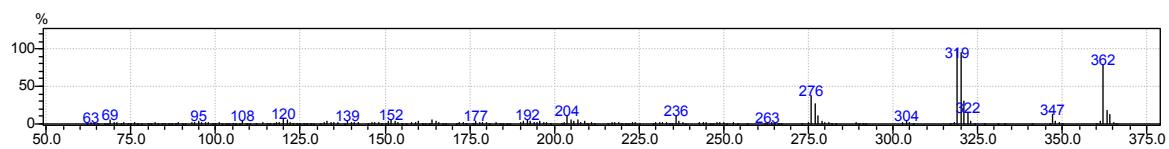

Figure S37. GC-MS spectra of 6r

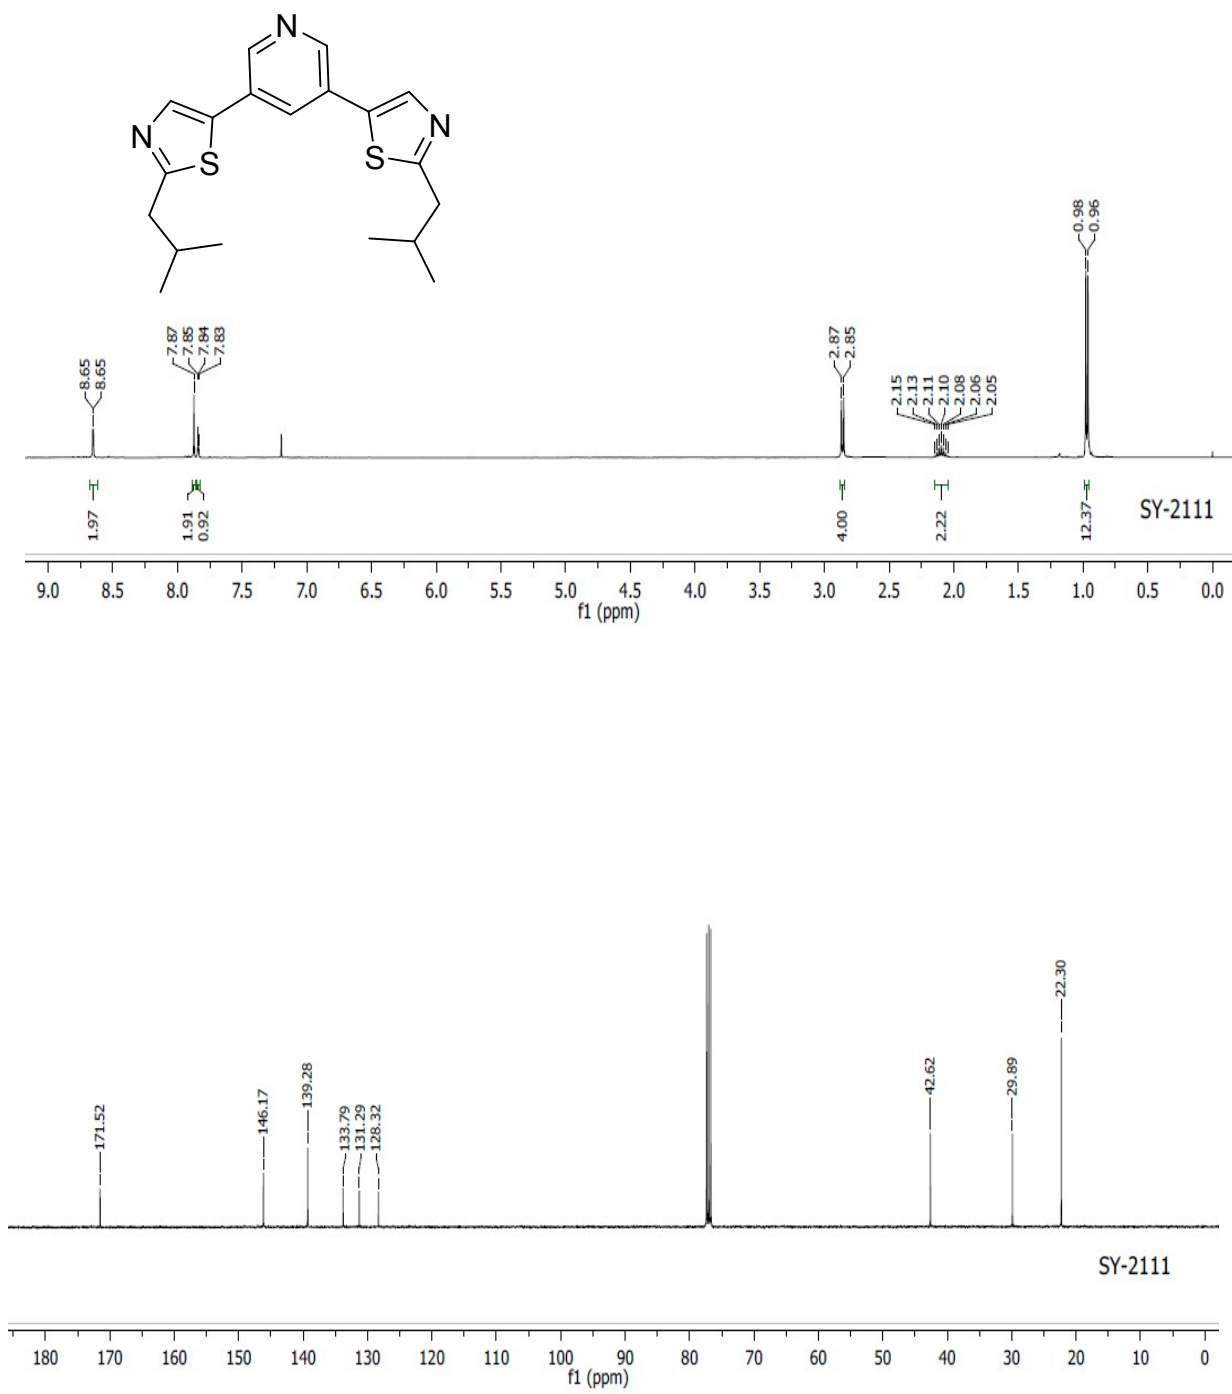

Figure S38. <sup>1</sup>H NMR and <sup>13</sup>C NMR spectra of 6s

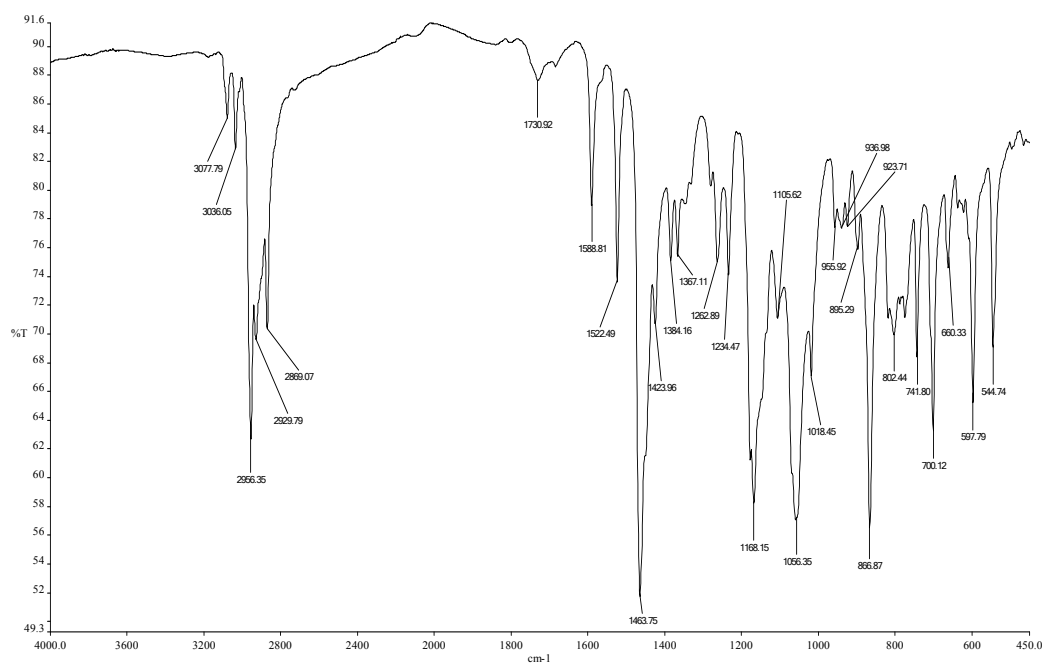

Figure S39. IR spectra of 6s

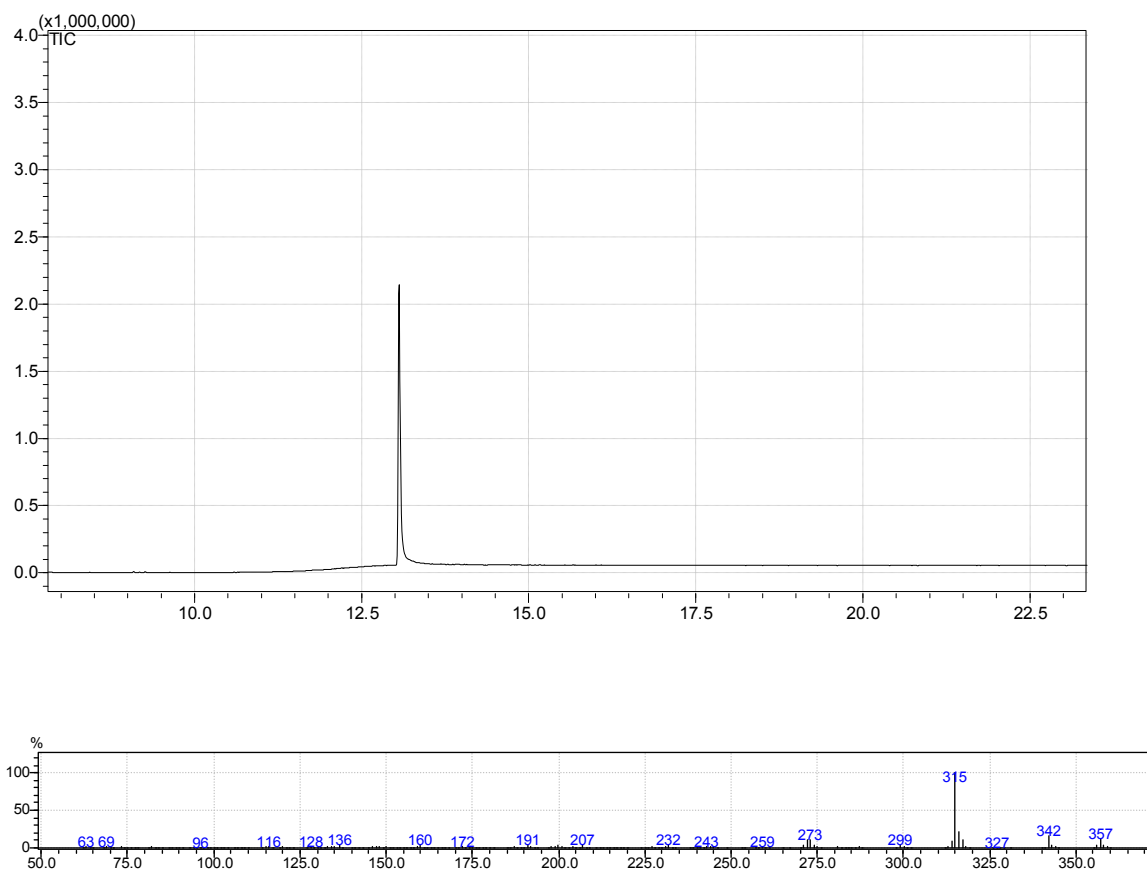

Figure S40. GC-MS spectra of 6s



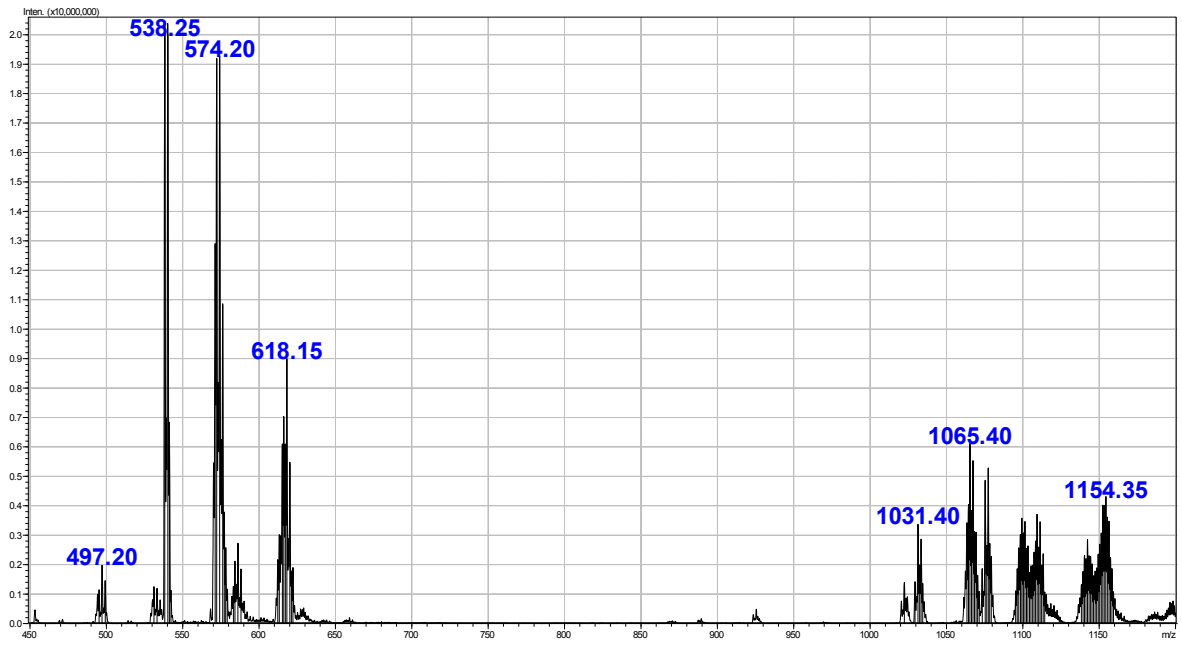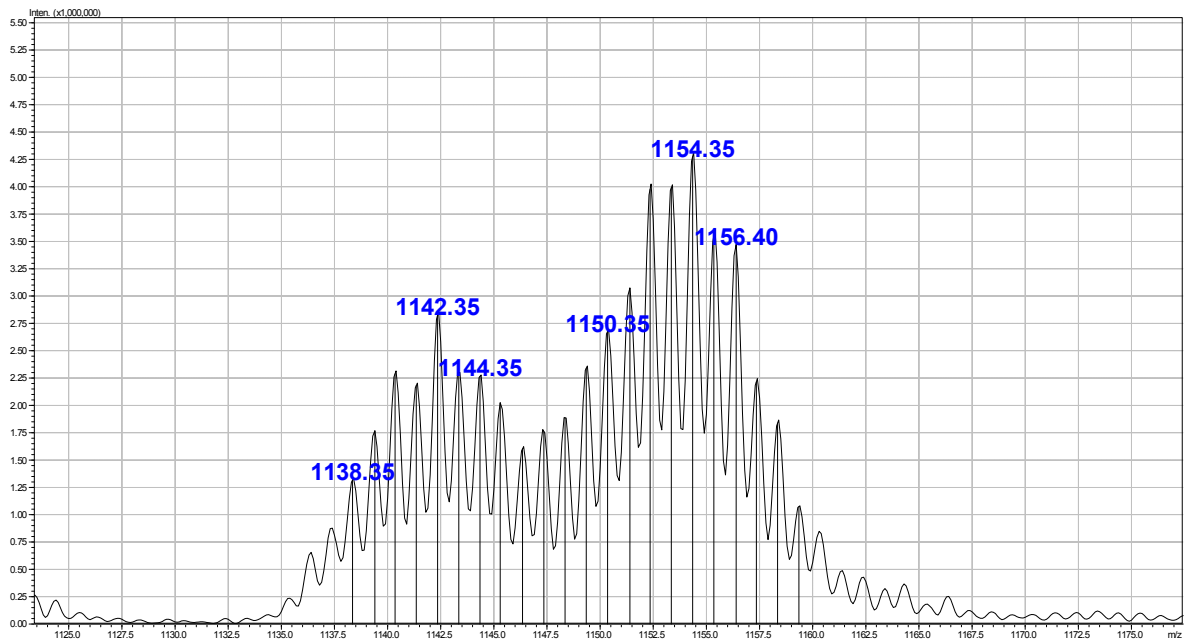

Figure S41. LC-MSMS spectra of 2

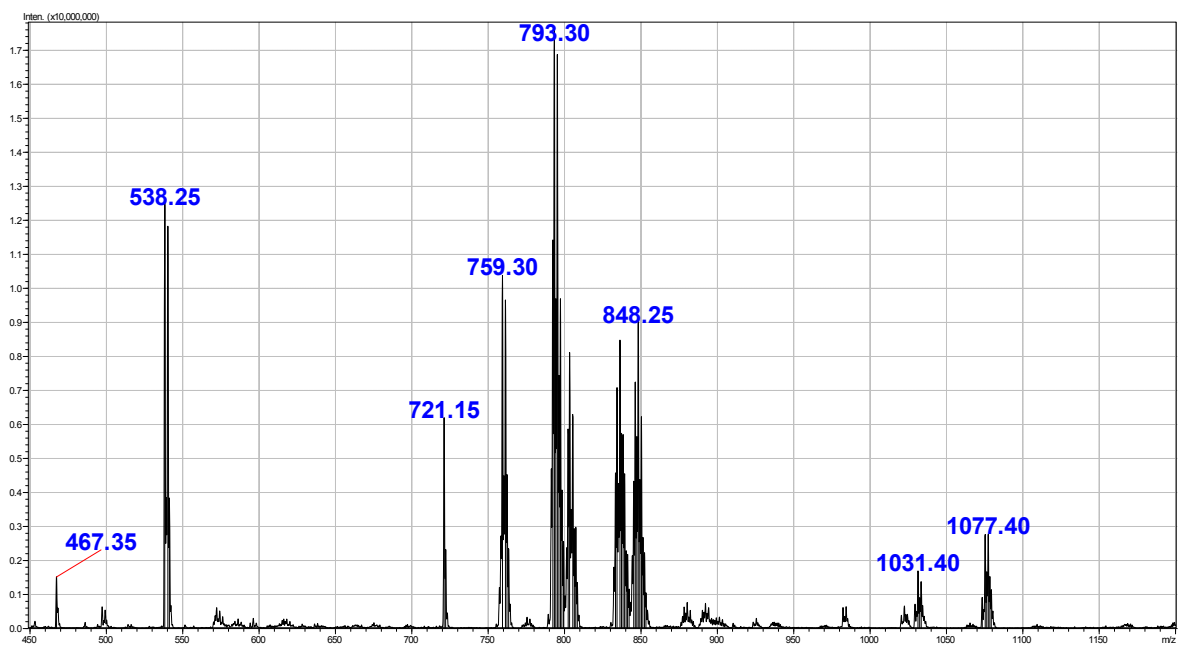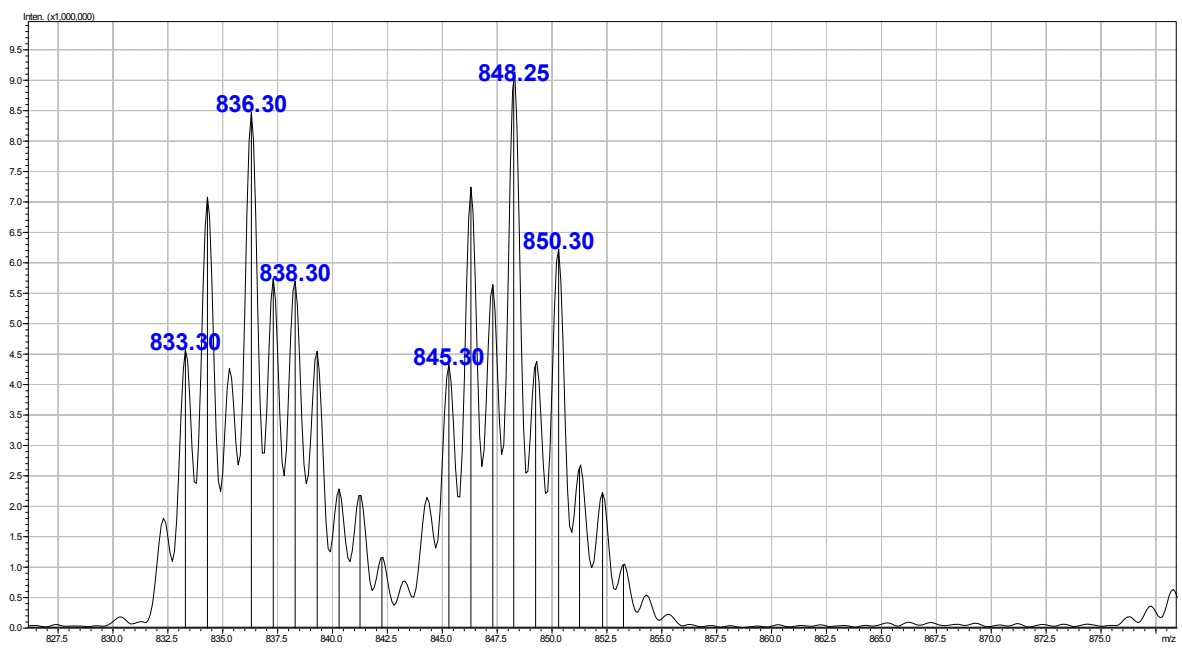

Figure S42. LC-MSMS spectra of 3

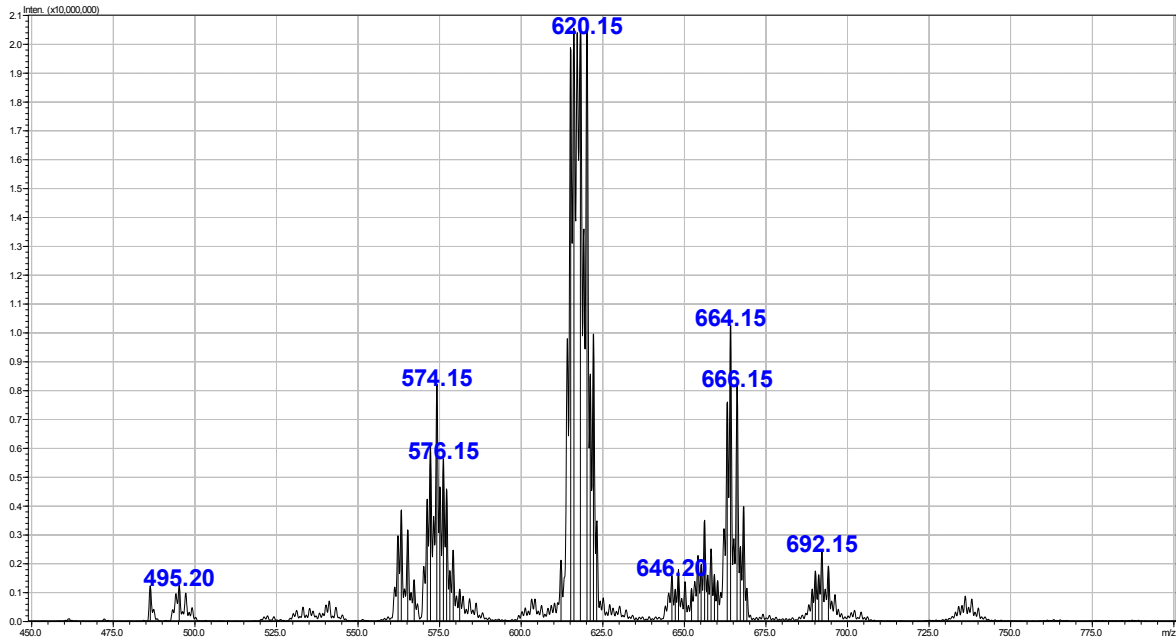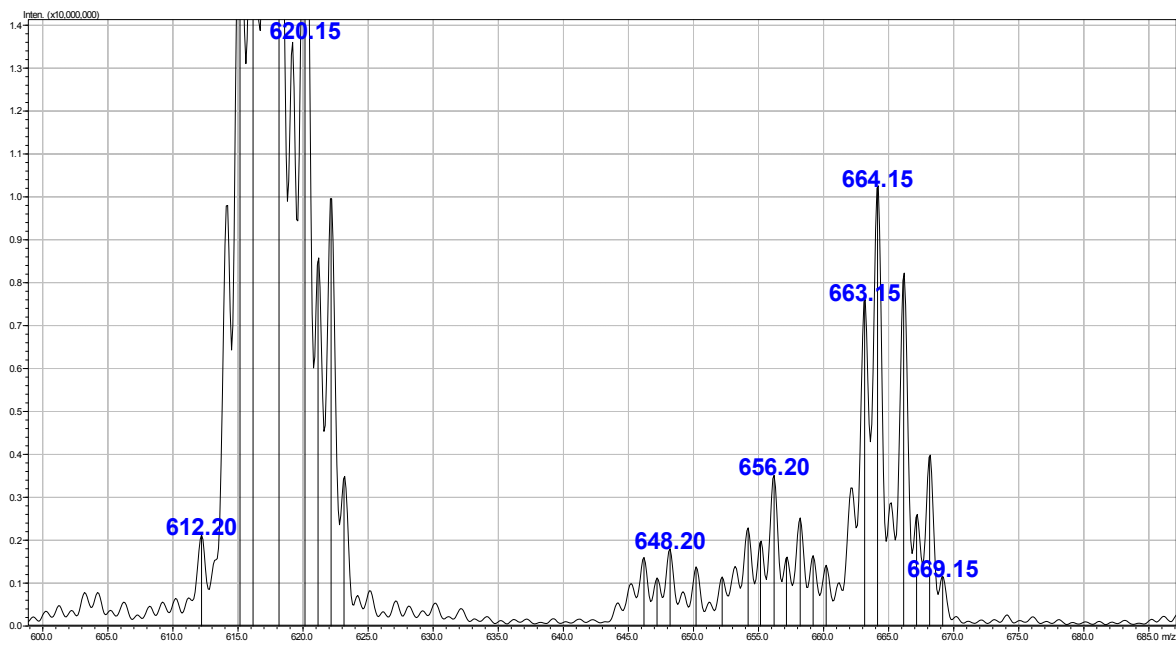

Figure S43. LC-MSMS spectra of 4

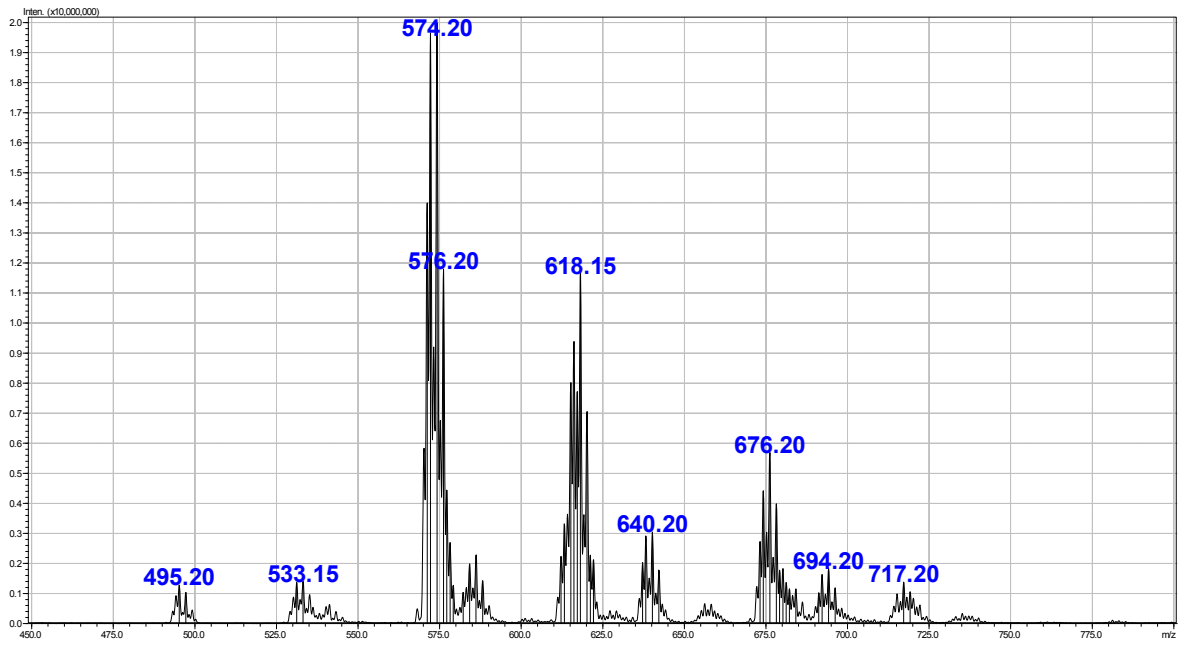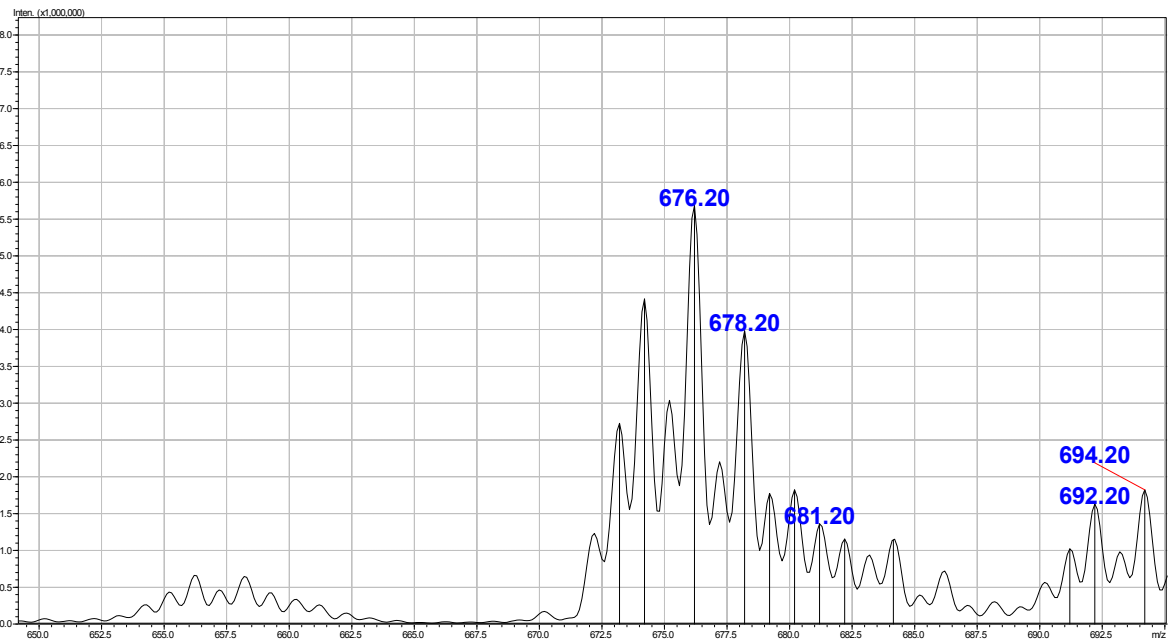

Figure S44. LC-MSMS spectra of 5
